# Supplementary material
Source: PubMed Central journal article supplement (PMC3391331)
Supplement: NIHMS382087-supplement-Supp_Fig_S1-S6___Table_S1-S2.pdf [file NIHMS382087-supplement-Supp_Fig_S1-S6___Table_S1-S2.pdf]

## Supplementary Figure Legends

### **Fig. S1. Alignment of the AbcR sRNAs from *Agrobacterium tumefaciens* C58 and *Brucella abortus* 2308**

The nucleotide sequence of AbcR1 and AbcR2 from *Brucella abortus* 2308 and *Agrobacterium tumefaciens* C58 were aligned using the AlignX<sup>®</sup> software from Vector NTI<sup>®</sup> (Invitrogen). Identical nucleotides between the two sRNAs are shown as the consensus sequence in bold font.

A. Alignment of AbcR1 sRNAs

B. Alignment of AbcR2 sRNAs

### **Fig. S2. Northern blot analysis of AbcR sRNAs from different *Brucella* species**

Total RNA isolated from cultures of *B. abortus* 2308, *B. suis* 1330, and *B. melitensis* 16M was separated on denaturing polyacrylamide gels. Following transfer to a membrane, a single probe designed to detect either AbcR1 or AbcR2 were used in the northern blot analyses. Detection of 5S rRNA was also performed as a loading control.

### **Fig. S3. Folding predictions of the AbcR1 and AbcR2 secondary structures**

Secondary structure predictions of the AbcR sRNAs from *Brucella abortus* 2308 were determined using mfold (<http://mfold.rna.albany.edu/?q=mfold>).

### **Fig. S4. Hfq binding to AbcR1 and AbcR2**

## SUPPLEMENTARY MATERIAL

Electrophoretic mobility shift assays (EMSAs) were employed to test the binding between of Hfq to the AbcR sRNAs, and methods described previously were used for these experiments (Caswell et al., 2012). The AbcR1 and AbcR2 sRNAs were transcribed in vitro and radiolabeled by [ $\alpha$ - $^{32}$ P]UTP incorporation, and EMSAs were performed using the labeled in vitro transcribed sRNAs and purified recombinant *Brucella abortus* Hfq. Increasing concentrations of rHfq were incubated with the labeled RNA probe, and the binding reactions were resolved in 5% native polyacrylamide gels and visualized by autoradiography.

### **Fig. S5. Schematic of putative interacting motif between the AbcR sRNAs and target mRNAs in *B. abortus* 2308.**

The numbers in parentheses depict the nucleotide position of the motif within the AbcR sRNAs, and similarly, the distance from the putative binding motif to the start codon is shown for the mRNAs.

### **Fig. S6. Proteomic analysis of *B. abortus* 2308 and the *B. abortus abcR1 abcR2* double mutant strains**

iTRAQ analysis was performed as described in the Experimental procedures. The value for a given protein represents the fold difference in the level of that protein between the two indicated strains. For example, values in the “*abcR*/WT-1” column depict protein levels in the *abcR1 abcR2* double mutant strain compared to protein levels in the parental strain 2308.

SUPPLEMENTARY MATERIAL

Figure S1

A

|                            |                                                   |                         |
|----------------------------|---------------------------------------------------|-------------------------|
| <i>Agrobacterium</i> AbcR1 | AGUUGAUGCACACGGUGGCUUUUCCUCCAGUUCCACCGCAUCAGCUGUU |                         |
| <i>Brucella</i> AbcR1      | -----ACUUACCGUUGUGCCUCCUCCCAUUGCGCACGG-UAAG-UGUU  |                         |
| <b>Consensus</b>           | <b>C AC GU G UCCUCCA U C CG U AG UGUU</b>         |                         |
| <i>Agrobacterium</i> AbcR1 | CCCUCUGGAGGUUUUUGACCUUCACACUAAAAGGGCCUG--GAUCUAU  |                         |
| <i>Brucella</i> AbcR1      | CCCUCUGGAGGUUUUGCCCAAGUGGCACCUUCAUAACUUGGCCGACUUC |                         |
| <b>Consensus</b>           | <b>CCCUCUGGAGGUU U CAC U A C G G CU</b>           |                         |
| <i>Agrobacterium</i> AbcR1 | CCGGCGGCCUCUUUUUUU                                | <b>Identity = 53.8%</b> |
| <i>Brucella</i> AbcR1      | CCAGUCCGGCUCUUUUUUU                               |                         |
| <b>Consensus</b>           | <b>CC G CUCUUUUUUU</b>                            |                         |

B

|                            |                                                     |                         |
|----------------------------|-----------------------------------------------------|-------------------------|
| <i>Agrobacterium</i> AbcR2 | -----CUGUCACGCUUGCCCACGGCAGCGACAGC----UGUUCCC       |                         |
| <i>Brucella</i> AbcR2      | AUCUCAGUGCUGCGUUUCCUCCUCCCAUUUUGCGCAGGCUGAGUGUUCCC  |                         |
| <b>Consensus</b>           | <b>CUG C U C C C GCG GC UGUUCCC</b>                 |                         |
| <i>Agrobacterium</i> AbcR2 | CUCUGGAGGUUU-----UG--ACCUCAAACUUGUCAGGCCGCGGAGC     |                         |
| <i>Brucella</i> AbcR2      | CUCUGGAGGUUUUGCCUCAUUGGCACCUUCAAAAUUCAAAAGCCG----GA |                         |
| <b>Consensus</b>           | <b>CUCUGGAGGUU UG ACCUCAA U U A GCCG G</b>          |                         |
| <i>Agrobacterium</i> AbcR2 | AAUCCAGCGCCUUCUUUUUUU                               | <b>Identity = 51.2%</b> |
| <i>Brucella</i> AbcR2      | CGUUUGUCUGGCUUUUUUUU-                               |                         |
| <b>Consensus</b>           | <b>U C G CUU UUUUU</b>                              |                         |

Figure S2

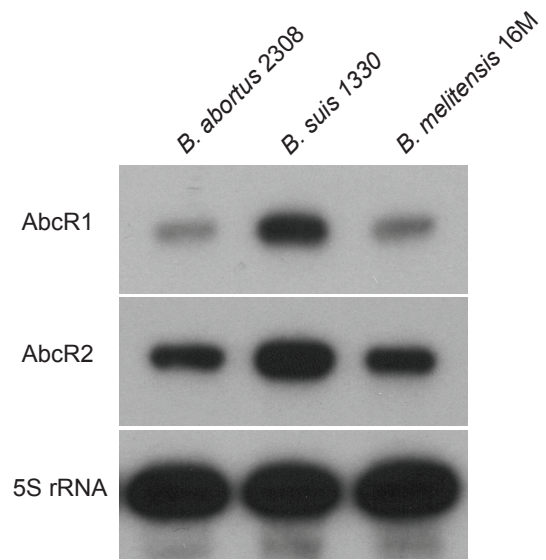

SUPPLEMENTARY MATERIAL

Figure S3

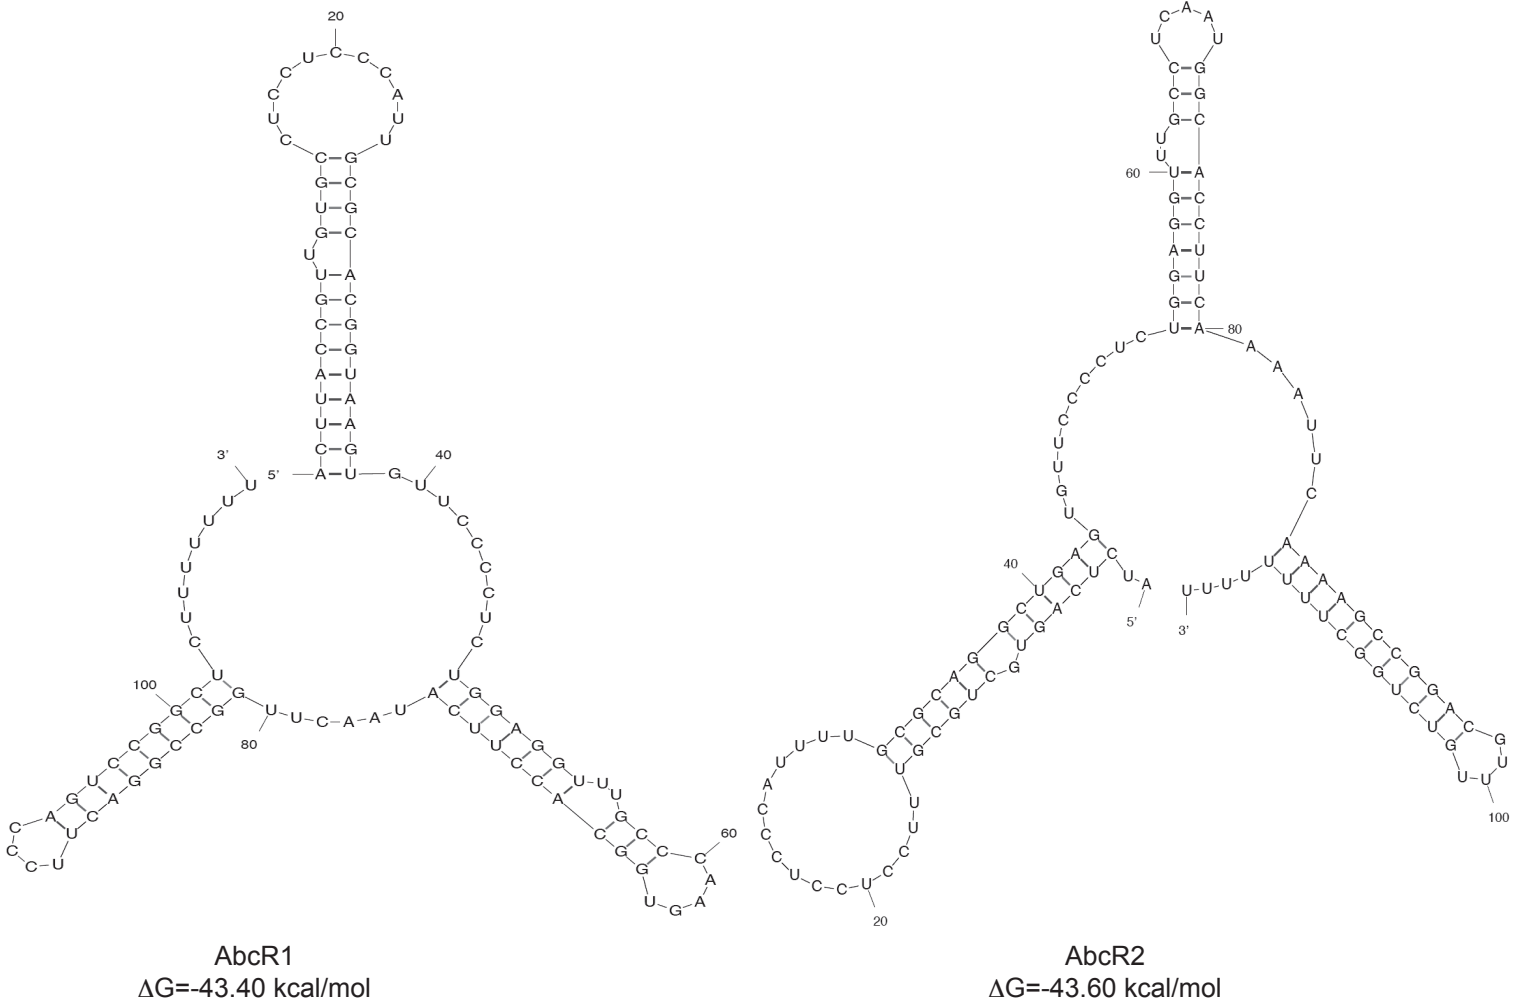

SUPPLEMENTARY MATERIAL

Figure S4

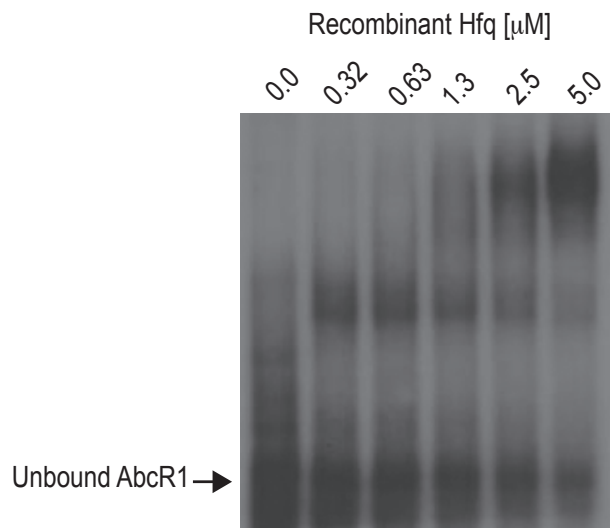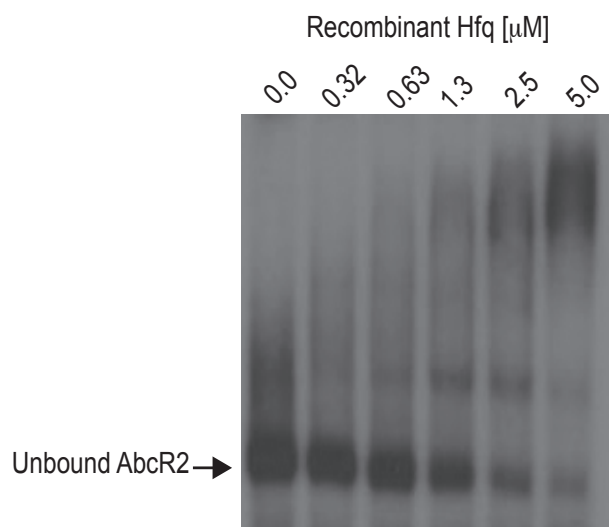

SUPPLEMENTARY MATERIAL

Figure S5

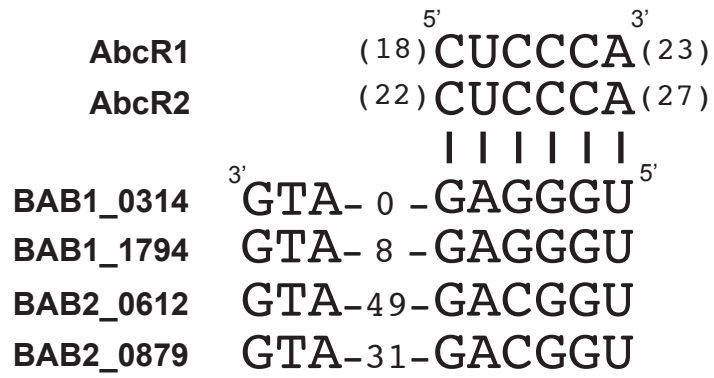

SUPPLEMENTARY MATERIAL

**Figure S6 Proteomic analysis of *B. abortus* 2308 and the *B. abortus abcR1 abcR2* double mutant strains**

| Accession # | Name                                               | BAB number | abcR/WT-1 | abcR/WT-2 | WT/WT  | abcR/abcR |
|-------------|----------------------------------------------------|------------|-----------|-----------|--------|-----------|
| gi 82700075 | DNA-directed RNA polymerase subunit beta'          | BAB1_1263  | 1.0357    | 1.0305    | 0.9956 | 1.0004    |
| gi 83269127 | chaperonin GroEL                                   | BAB2_0189  | 1.109     | 1.0669    | 0.9467 | 0.9831    |
| gi 82700076 | DNA-directed RNA polymerase subunit beta           | BAB1_1264  | 1.0087    | 1.0265    | 0.9991 | 0.9808    |
| gi 82700876 | molecular chaperone DnaK                           | BAB1_2129  | 1.0564    | 1.0474    | 0.995  | 1.0037    |
| gi 82700083 | elongation factor Tu                               | BAB1_1271  | 0.9799    | 1.0024    | 0.9948 | 0.9719    |
| gi 82700597 | NAD-glutamate dehydrogenase                        | BAB1_1827  | 1.1603    | 1.1623    | 1.0062 | 1.0046    |
| gi 82700638 | chaperonin ClpA/B                                  | BAB1_1868  | 1.0928    | 1.0673    | 0.9808 | 1.0033    |
| gi 82700689 | alpha-ketoglutarate decarboxylase                  | BAB1_1923  | 1.0184    | 1.0333    | 1.0078 | 0.9925    |
| gi 82700070 | elongation factor G                                | BAB1_1258  | 1.0541    | 1.0465    | 0.9873 | 0.9931    |
| gi 82699012 | aconitate hydratase                                | BAB1_0090  | 1.0533    | 1.0518    | 1.0158 | 1.0175    |
| gi 82700911 | translation initiation factor IF-2                 | BAB1_2165  | 1.0018    | 1.0496    | 1.0483 | 0.9999    |
| gi 82700915 | polynucleotide phosphorylase/polyadenylase         | BAB1_2169  | 1.0392    | 1.0328    | 0.9806 | 0.986     |
| gi 82699768 | trigger factor                                     | BAB1_0917  | 1.0253    | 0.9831    | 0.975  | 1.0161    |
| gi 82700579 | F0F1 ATP synthase subunit beta                     | BAB1_1807  | 0.9775    | 0.9948    | 1.0105 | 0.9915    |
| gi 82700692 | malate dehydrogenase                               | BAB1_1927  | 0.9741    | 0.9994    | 1.0212 | 0.9948    |
| gi 82699993 | surface antigen (D15)                              | BAB1_1176  | 1.02      | 1.0237    | 0.9917 | 0.9875    |
| gi 82698954 | 30S ribosomal protein S1                           | BAB1_0025  | 1.0443    | 1.0375    | 0.9889 | 0.9948    |
| gi 82700691 | succinyl-CoA synthetase subunit beta               | BAB1_1926  | 0.9822    | 0.958     | 0.9908 | 1.0154    |
| gi 83269417 | bifunctional proline dehydrogenase                 | BAB2_0518  | 1.4853    | 1.5006    | 1.017  | 1.0061    |
| gi 82700581 | F0F1 ATP synthase subunit alpha                    | BAB1_1809  | 1.0066    | 1.0048    | 0.973  | 0.9744    |
| gi 82700516 | transketolase                                      | BAB1_1740  | 1.0235    | 0.9817    | 0.9944 | 1.0357    |
| gi 82699578 | leucyl aminopeptidase                              | BAB1_0710  | 1.0029    | 1.0125    | 1.0051 | 0.9951    |
| gi 82698997 | argininosuccinate synthase                         | BAB1_0071  | 1.0431    | 1.0298    | 0.9838 | 0.9952    |
| gi 82700690 | succinyl-CoA synthetase subunit alpha              | BAB1_1925  | 1.0209    | 0.9921    | 0.983  | 1.0105    |
| gi 82699528 | hypothetical protein BAB1_0660                     | BAB1_0660  | 0.8552    | 0.8618    | 0.9474 | 0.9394    |
| gi 82700709 | preprotein translocase subunit SecA                | BAB1_1946  | 0.9886    | 0.987     | 0.9946 | 0.9957    |
| gi 82699892 | ribonucleotide-diphosphate reductase subunit alpha | BAB1_1063  | 1.1122    | 1.1493    | 1.0369 | 1.0014    |
| gi 83269363 | glucose-6-phosphate 1-dehydrogenase                | BAB2_0460  | 0.9705    | 0.9479    | 0.9748 | 0.9979    |
| gi 82700033 | isocitrate dehydrogenase                           | BAB1_1221  | 0.9184    | 0.9495    | 1.0277 | 0.9934    |
| gi 82699685 | NADH dehydrogenase subunit G                       | BAB1_0828  | 1.0562    | 1.0741    | 0.9895 | 0.9725    |
| gi 82699815 | valyl-tRNA synthetase                              | BAB1_0966  | 0.9717    | 0.9921    | 0.9978 | 0.9766    |
| gi 82700300 | carbamoyl phosphate synthase large subunit         | BAB1_1508  | 1.0974    | 1.0521    | 0.9975 | 1.0391    |
| gi 82700000 | elongation factor Ts                               | BAB1_1183  | 1.076     | 0.9873    | 0.9821 | 1.0744    |
| gi 82699405 | pyruvate phosphate dikinase                        | BAB1_0525  | 0.9888    | 0.998     | 1.013  | 1.0036    |
| gi 82699705 | 30S ribosomal protein S4                           | BAB1_0851  | 0.9084    | 0.9641    | 1.0385 | 0.9768    |
| gi 82699987 | type II citrate synthase                           | BAB1_1170  | 0.9958    | 1.0286    | 1.0149 | 0.9813    |
| gi 82699949 | chaperonin ClpA/B                                  | BAB1_1130  | 1.0805    | 1.1015    | 0.9872 | 0.9678    |
| gi 82700567 | Leu/Ile/Val-binding family protein                 | BAB1_1794  | 6.1752    | 5.7498    | 0.9338 | 1         |
| gi 82700043 | DNA-directed RNA polymerase subunit alpha          | BAB1_1231  | 1.0319    | 1.0514    | 0.9997 | 0.9808    |
| gi 82700688 | dihydrolipoamide acetyltransferase                 | BAB1_1922  | 0.9902    | 0.9968    | 1.0127 | 1.006     |



SUPPLEMENTARY MATERIAL

|              |                                                                       |           |        |        |        |        |
|--------------|-----------------------------------------------------------------------|-----------|--------|--------|--------|--------|
| gi 82700535  | pyruvate kinase                                                       | BAB1_1761 | 0.9846 | 0.9977 | 1.0195 | 1.0057 |
| gi 82699210  | glucose-6-phosphate isomerase                                         | BAB1_0316 | 0.9085 | 0.952  | 1.029  | 0.9816 |
| gi 82700001  | 30S ribosomal protein S2                                              | BAB1_1184 | 1.0305 | 1.0226 | 0.996  | 1.0033 |
| gi 83269857  | phosphoglyceromutase                                                  | BAB2_1013 | 1.0749 | 1.017  | 0.9471 | 1.0012 |
| gi 83269434  | copper/Zinc superoxide dismutase                                      | BAB2_0535 | 0.9258 | 0.8915 | 0.9699 | 1.0072 |
| gi 162002872 | 2-isopropylmalate synthase                                            | BAB1_1583 | 0.9895 | 0.9369 | 0.9328 | 0.9842 |
| gi 82699634  | aspartyl-tRNA synthetase                                              | BAB1_0775 | 1.0887 | 1.0262 | 0.9831 | 1.0483 |
| gi 83269582  | solute-binding family 5 protein                                       | BAB2_0699 | 2.3464 | 2.1712 | 0.9242 | 0.9986 |
| gi 83269060  | 6-phosphogluconate dehydrogenase                                      | BAB2_0109 | 0.9634 | 0.9612 | 0.9931 | 0.9947 |
| gi 82698981  | phosphoglucomutase                                                    | BAB1_0055 | 1.0853 | 1.0832 | 1.0049 | 1.0069 |
| gi 82700896  | DNA starvation/stationary phase protection protein Dps                | BAB1_2150 | 0.9682 | 0.9302 | 0.9726 | 1.0125 |
| gi 82700007  | chaperonin ClpA/B                                                     | BAB1_1191 | 1.0275 | 1.0315 | 1.0206 | 1.0178 |
| gi 82700587  | leucyl-tRNA synthetase                                                | BAB1_1815 | 0.9516 | 0.9918 | 1.0361 | 0.9927 |
| gi 82700242  | cell division protein FtsZ                                            | BAB1_1444 | 0.9251 | 1.052  | 1.0994 | 0.9689 |
| gi 82699682  | NADH dehydrogenase subunit D                                          | BAB1_0825 | 1.0301 | 1.0063 | 0.9812 | 1.0044 |
| gi 82699040  | hypothetical protein BAB1_0118                                        | BAB1_0118 | 1.0386 | 0.9781 | 0.9568 | 1.0159 |
| gi 83269309  | N-6 adenine-specific DNA methylase                                    | BAB2_0397 | 0.9753 | 1.0244 | 1.0477 | 0.9972 |
| gi 82700615  | tail specific protease                                                | BAB1_1845 | 1.0045 | 1.0145 | 0.9994 | 0.9891 |
| gi 82700064  | 50S ribosomal protein L2                                              | BAB1_1252 | 1.0377 | 1.0177 | 0.9917 | 1.01   |
| gi 82699319  | glycyl-tRNA synthetase subunit beta                                   | BAB1_0433 | 0.9372 | 0.9464 | 1.0053 | 0.9944 |
| gi 83269116  | aldo/keto reductase                                                   | BAB2_0177 | 1.1    | 1.0184 | 0.9366 | 1.011  |
| gi 82699747  | arginyl-tRNA synthetase                                               | BAB1_0896 | 1.0109 | 1.0073 | 1.0014 | 1.0048 |
| gi 82699711  | phosphoribosylformylglycinamide synthase II                           | BAB1_0857 | 1.0318 | 0.9824 | 0.9813 | 1.0302 |
| gi 82700909  | transcription elongation factor NusA                                  | BAB1_2163 | 0.9864 | 1.0004 | 1.0052 | 0.991  |
| gi 82700383  | substrate-binding region of ABC-type glycine betaine transport system | BAB1_1593 | 1.4082 | 1.3366 | 0.9564 | 1.006  |
| gi 82700055  | 50S ribosomal protein L5                                              | BAB1_1243 | 0.9542 | 1.0018 | 1.034  | 0.9854 |
| gi 82700707  | PpiC-type peptidyl-prolyl cis-trans isomerase                         | BAB1_1944 | 1.0229 | 0.9681 | 0.9876 | 1.0407 |
| gi 82699672  | O-acetylhomoserine aminocarboxypropyltransferase                      | BAB1_0813 | 1.029  | 0.9487 | 0.9275 | 1.0047 |
| gi 83269277  | elongation factor G                                                   | BAB2_0361 | 1.0738 | 1.0675 | 1.0127 | 1.0184 |
| gi 82700343  | 50S ribosomal protein L25/general stress protein Ctc                  | BAB1_1551 | 1.0321 | 1.0067 | 1.0193 | 1.0434 |
| gi 82699086  | GrpE protein                                                          | BAB1_0170 | 1.0777 | 1.0176 | 0.9835 | 1.04   |
| gi 82699425  | Short-chain dehydrogenase                                             | BAB1_0545 | 0.9706 | 0.9902 | 0.999  | 0.9783 |
| gi 82700684  | dihydrolipoamide dehydrogenase                                        | BAB1_1918 | 1.1111 | 1.0706 | 0.9562 | 0.9897 |
| gi 82700158  | calcium-binding EF-hand                                               | BAB1_1355 | 0.8286 | 0.8497 | 0.9988 | 0.9735 |
| gi 82699781  | ribonuclease E and G                                                  | BAB1_0930 | 1.0229 | 1.0117 | 1      | 1.0106 |
| gi 82699950  | ATP-dependent protease ATP-binding subunit                            | BAB1_1131 | 1.0079 | 1.035  | 1.014  | 0.9864 |
| gi 82699363  | 50S ribosomal protein L9                                              | BAB1_0477 | 0.9943 | 1.0087 | 0.9958 | 0.9812 |
| gi 82700669  | succinate dehydrogenase flavoprotein subunit                          | BAB1_1901 | 0.9683 | 1.0076 | 1.0291 | 0.9879 |
| gi 82700035  | alanyl-tRNA synthetase                                                | BAB1_1223 | 1.0868 | 0.977  | 0.9376 | 1.0409 |
| gi 83269444  | solute-binding family 1 protein                                       | BAB2_0547 | 0.8859 | 0.8561 | 0.9263 | 0.9575 |
| gi 82699769  | aspartyl/glutamyl-tRNA amidotransferase subunit B                     | BAB1_0918 | 1.011  | 0.9896 | 0.9782 | 0.9977 |
| gi 82700850  | S-adenosyl-L-homocysteine hydrolase                                   | BAB1_2099 | 1.0342 | 1.0074 | 0.9679 | 0.9923 |
| gi 82700282  | choloylglycine hydrolase                                              | BAB1_1488 | 0.945  | 0.9172 | 0.9627 | 0.99   |

## SUPPLEMENTARY MATERIAL

|             |                                                                |           |        |        |        |        |
|-------------|----------------------------------------------------------------|-----------|--------|--------|--------|--------|
| gi 83269216 | dihydroxy-acid dehydratase                                     | BAB2_0294 | 1.1336 | 1.1507 | 1.0229 | 1.0073 |
| gi 82700077 | 50S ribosomal protein L7/L12                                   | BAB1_1265 | 1.2614 | 1.1004 | 0.9465 | 1.0758 |
| gi 82700517 | glyceraldehyde 3-phosphate dehydrogenase                       | BAB1_1741 | 0.9994 | 0.9708 | 0.9574 | 0.9844 |
| gi 83269274 | peptidase M3:neutral zinc metallopeptidases                    | BAB2_0358 | 1.1773 | 1.0571 | 0.9043 | 1.0052 |
| gi 82700195 | aminotransferase, class I and II                               | BAB1_1397 | 0.9585 | 0.9438 | 0.9501 | 0.9644 |
| gi 82700604 | ATP/GTP-binding motif-containing protein                       | BAB1_1834 | 0.8886 | 0.9809 | 1.0751 | 0.9738 |
| gi 82699972 | enolase                                                        | BAB1_1155 | 1.0038 | 0.9914 | 0.9941 | 1.0071 |
| gi 82699966 | dihydrolipoamide dehydrogenase                                 | BAB1_1149 | 1.1172 | 1.0922 | 1.001  | 1.023  |
| gi 82699503 | serine protease family protein                                 | BAB1_0635 | 0.9613 | 0.865  | 0.9212 | 1.026  |
| gi 82700306 | aspartate aminotransferase                                     | BAB1_1514 | 0.8587 | 0.8506 | 0.9827 | 0.9909 |
| gi 82700061 | 30S ribosomal protein S3                                       | BAB1_1249 | 0.9686 | 1.0313 | 1.0399 | 0.9764 |
| gi 82699940 | DNA gyrase subunit A                                           | BAB1_1121 | 0.9972 | 1.0441 | 1.0267 | 0.9801 |
| gi 82699257 | saccharopine dehydrogenase                                     | BAB1_0364 | 0.8817 | 0.9202 | 1.0162 | 0.9739 |
| gi 82699956 | chaperonin clpA/B                                              | BAB1_1138 | 0.9458 | 0.9804 | 1.0138 | 0.9781 |
| gi 83269281 | fructose-1,6-bisphosphate aldolase                             | BAB2_0365 | 1.091  | 1.0838 | 0.9943 | 0.9996 |
| gi 83269414 | glycine dehydrogenase                                          | BAB2_0515 | 1.2031 | 1.2301 | 1.0007 | 0.9782 |
| gi 82700564 | pyruvate carboxylase                                           | BAB1_1791 | 1.0364 | 1.0325 | 0.9947 | 0.9972 |
| gi 82699636 | DNA topoisomerase IV subunit A                                 | BAB1_0777 | 0.9253 | 0.9982 | 1.0561 | 0.9783 |
| gi 83269128 | co-chaperonin GroES                                            | BAB2_0190 | 0.9969 | 0.9651 | 1.0007 | 1.0356 |
| gi 83269714 | inositol-5-monophosphate dehydrogenase                         | BAB2_0851 | 1.0882 | 1.0359 | 0.9849 | 1.0337 |
| gi 82700079 | 50S ribosomal protein L1                                       | BAB1_1267 | 1.0563 | 1.0173 | 0.9566 | 0.992  |
| gi 82700752 | inorganic pyrophosphatase                                      | BAB1_1993 | 0.9519 | 0.9564 | 1.0163 | 1.0109 |
| gi 82700071 | 30S ribosomal protein S7                                       | BAB1_1259 | 1.0309 | 1.0393 | 0.9811 | 0.9723 |
| gi 82699030 | cyclic beta 1-2 glucan synthetase                              | BAB1_0108 | 0.9927 | 0.9967 | 1.0281 | 1.024  |
| gi 82699915 | threonyl-tRNA synthetase                                       | BAB1_1093 | 1.1054 | 0.9887 | 0.9677 | 1.0825 |
| gi 82699048 | zinc-containing alcohol dehydrogenase                          | BAB1_0128 | 1.001  | 1.021  | 1.0061 | 0.9861 |
| gi 83269132 | isoleucyl-tRNA synthetase                                      | BAB2_0194 | 1.0184 | 1.0509 | 1.0178 | 0.9852 |
| gi 82699684 | NADH dehydrogenase I subunit F                                 | BAB1_0827 | 1.0583 | 1.0609 | 0.9957 | 0.9925 |
| gi 82699967 | branched-chain alpha-keto acid dehydrogenase subunit E2        | BAB1_1150 | 1.1724 | 1.1293 | 1.0002 | 1.0377 |
| gi 82700819 | transcription termination factor Rho                           | BAB1_2065 | 0.978  | 1.0202 | 1.0368 | 0.9926 |
| gi 82699968 | pyruvate dehydrogenase subunit beta                            | BAB1_1151 | 1.12   | 1.1239 | 0.9726 | 0.9684 |
| gi 82699861 | hypothetical protein BAB1_1029                                 | BAB1_1029 | 1.0655 | 0.9564 | 0.9509 | 1.06   |
| gi 82700272 | putative ABC transporter ATP-binding protein                   | BAB1_1474 | 1.0502 | 1.0147 | 0.9812 | 1.0161 |
| gi 82700674 | 50S ribosomal protein L19                                      | BAB1_1906 | 0.9928 | 1.0091 | 1.0145 | 0.9977 |
| gi 82699465 | esterase/lipase/thioesterase                                   | BAB1_0593 | 1.0548 | 0.9885 | 0.9839 | 1.0495 |
| gi 82700197 | ketol-acid reductoisomerase                                    | BAB1_1399 | 0.9063 | 0.9202 | 0.9852 | 0.9688 |
| gi 82699794 | tyrosyl-tRNA synthetase                                        | BAB1_0943 | 0.9617 | 0.9164 | 0.9475 | 0.9935 |
| gi 82700844 | response regulator receiver:transcriptional regulatory protein | BAB1_2092 | 0.9418 | 0.9859 | 0.992  | 0.9465 |
| gi 82699539 | DNA-directed RNA polymerase subunit omega                      | BAB1_0671 | 1.0298 | 0.9825 | 0.9616 | 1.0045 |
| gi 82700931 | enoyl-CoA hydratase                                            | BAB1_2185 | 0.9916 | 1.0008 | 1.0126 | 1.0038 |
| gi 82699699 | prolyl-tRNA synthetase                                         | BAB1_0842 | 1.0022 | 0.9789 | 0.9778 | 1.0005 |
| gi 82700425 | periplasmic binding protein/LacI transcriptional regulator     | BAB1_1648 | 1.0128 | 0.9966 | 0.9905 | 1.0039 |
| gi 82699722 | adenylosuccinate lyase                                         | BAB1_0868 | 0.9703 | 1.0131 | 1.0202 | 0.9767 |

SUPPLEMENTARY MATERIAL

|              |                                                                        |           |        |        |        |        |
|--------------|------------------------------------------------------------------------|-----------|--------|--------|--------|--------|
| gi 162002882 | aminotransferase                                                       | BAB2_0572 | 1.0934 | 1.0145 | 0.9255 | 0.9964 |
| gi 82699806  | ATP-dependent helicase                                                 | BAB1_0955 | 1.2236 | 1.003  | 0.9559 | 1.1904 |
| gi 82699225  | bifunctional N-succinyldiaminopimelate-aminotransferase                | BAB1_0331 | 1.0436 | 1.0507 | 1.0086 | 1.001  |
| gi 82700554  | hypothetical protein BAB1_1781                                         | BAB1_1781 | 0.9932 | 1.0231 | 1.0214 | 0.9913 |
| gi 82700067  | 50S ribosomal protein L3                                               | BAB1_1255 | 0.9855 | 1.0527 | 1.022  | 0.956  |
| gi 82700448  | two-component response regulator                                       | BAB1_1671 | 1.1461 | 1.0313 | 0.9411 | 1.0445 |
| gi 82699590  | OmpA-like transmembrane domain-containing protein                      | BAB1_0722 | 1.3127 | 1.0254 | 0.9488 | 1.2131 |
| gi 82700292  | RNA polymerase sigma factor RpoD                                       | BAB1_1498 | 1.0411 | 1.0081 | 0.9961 | 1.0277 |
| gi 82699105  | aminotransferase                                                       | BAB1_0191 | 0.9329 | 0.9246 | 0.9692 | 0.9777 |
| gi 82700050  | 30S ribosomal protein S5                                               | BAB1_1238 | 1.0072 | 1.0049 | 0.982  | 0.9837 |
| gi 83269530  | aspartyl/glutamyl-tRNA amidotransferase subunit A                      | BAB2_0646 | 1.0137 | 1.0052 | 0.9653 | 0.9726 |
| gi 82700213  | Band 7 protein                                                         | BAB1_1415 | 1.0012 | 1.0084 | 0.9927 | 0.9849 |
| gi 82700081  | transcription antitermination protein NusG                             | BAB1_1269 | 1.0273 | 1.0021 | 0.9746 | 0.999  |
| gi 83269705  | bifunctional GMP synthase/glutamine amidotransferase protein           | BAB2_0842 | 0.9546 | 0.9784 | 1.0058 | 0.9802 |
| gi 82699986  | glutamyl-tRNA synthetase                                               | BAB1_1169 | 1.0847 | 1.0529 | 0.9732 | 1.0025 |
| gi 82699372  | 3-oxoacyl-(acyl carrier protein) synthase II                           | BAB1_0486 | 1.1527 | 1.0266 | 0.9516 | 1.0678 |
| gi 83269293  | periplasmic binding protein/LacI transcriptional regulator             | BAB2_0377 | 0.8519 | 0.7984 | 0.9319 | 0.9935 |
| gi 82699575  | organic solvent tolerance protein                                      | BAB1_0707 | 1.1402 | 0.954  | 0.8519 | 1.0178 |
| gi 82700214  | Band 7 protein:stomatin                                                | BAB1_1416 | 1.0403 | 0.977  | 0.953  | 1.0141 |
| gi 82700585  | putative transaldolase                                                 | BAB1_1813 | 1.0274 | 1.0074 | 0.967  | 0.9857 |
| gi 82699775  | acetyl-CoA carboxylase biotin carboxylase subunit                      | BAB1_0924 | 0.9486 | 0.9731 | 1      | 0.9744 |
| gi 82700645  | 3-demethylubiquinone-9 3-methyltransferase                             | BAB1_1875 | 1.004  | 0.9635 | 0.9833 | 1.0228 |
| gi 82700705  | bifunctional ornithine acetyltransferase                               | BAB1_1942 | 1.1072 | 1.0058 | 0.9309 | 1.0236 |
| gi 82699018  | dihydroxy-acid dehydratase                                             | BAB1_0096 | 1.0209 | 1.0457 | 1.0323 | 1.0068 |
| gi 82700471  | adenylosuccinate synthetase                                            | BAB1_1695 | 1.0077 | 0.9694 | 0.9712 | 1.0086 |
| gi 82699716  | phosphoribosylaminoimidazole-succinocarboxamide synthase               | BAB1_0862 | 1.0448 | 1.0019 | 0.9543 | 0.9943 |
| gi 82699119  | aldehyde dehydrogenase                                                 | BAB1_0211 | 1.0585 | 1.0915 | 1.0004 | 0.9693 |
| gi 82699044  | DNA gyrase subunit B                                                   | BAB1_0122 | 0.9404 | 1.0044 | 1.0458 | 0.9785 |
| gi 82700668  | succinate dehydrogenase iron-sulfur subunit                            | BAB1_1900 | 1.0226 | 0.9832 | 0.9514 | 0.988  |
| gi 82700596  | bifunctional phosphoribosylaminoimidazolecarboxamide formyltransferase | BAB1_1824 | 1.0536 | 1.0307 | 1.0139 | 1.0364 |
| gi 83269442  | riboflavin synthase subunit beta                                       | BAB2_0545 | 0.9897 | 0.9816 | 1.0046 | 1.0122 |
| gi 82699744  | hypothetical protein BAB1_0893                                         | BAB1_0893 | 1.1735 | 1.1059 | 0.9588 | 1.0164 |
| gi 82700479  | peptidase M41                                                          | BAB1_1703 | 1.1028 | 1.0432 | 0.9386 | 0.991  |
| gi 82700860  | acetyl-CoA carboxylase subunit beta                                    | BAB1_2109 | 1.0116 | 0.9795 | 0.9382 | 0.9691 |
| gi 83269836  | 2,3,4,5-tetrahydropyridine-2-carboxylate N-succinyltransferase         | BAB2_0991 | 1.0531 | 1.0127 | 0.947  | 0.9841 |
| gi 82700053  | 30S ribosomal protein S8                                               | BAB1_1241 | 0.9839 | 0.9868 | 1.0045 | 1.0011 |
| gi 82700066  | 50S ribosomal protein L4                                               | BAB1_1254 | 0.9751 | 1.0064 | 0.9955 | 0.9635 |
| gi 82700052  | 50S ribosomal protein L6                                               | BAB1_1240 | 0.9391 | 1.0018 | 1.0652 | 0.9957 |
| gi 82700147  | bifunctional preprotein translocase subunit SecD/SecF                  | BAB1_1344 | 0.9801 | 1.0261 | 1.0264 | 0.9704 |
| gi 83269740  | solute-binding family 1 protein                                        | BAB2_0879 | 5.5857 | 5.2005 | 0.9725 | 1.015  |
| gi 82699646  | serine hydroxymethyltransferase                                        | BAB1_0787 | 0.9587 | 0.9987 | 1.0172 | 0.9761 |
| gi 82700045  | 30S ribosomal protein S13                                              | BAB1_1233 | 1.0532 | 1.0392 | 0.9862 | 0.9992 |
| gi 82700177  | urease subunit alpha                                                   | BAB1_1378 | 0.9913 | 0.9502 | 0.9875 | 1.0302 |

SUPPLEMENTARY MATERIAL

|             |                                                                         |           |        |        |        |        |
|-------------|-------------------------------------------------------------------------|-----------|--------|--------|--------|--------|
| gi 83269520 | DNA topoisomerase I                                                     | BAB2_0636 | 1.0444 | 1.0031 | 0.9959 | 1.0367 |
| gi 83269549 | hypothetical protein BAB2_0665                                          | BAB2_0665 | 1.1958 | 1.1404 | 0.9548 | 1.0011 |
| gi 83269821 | solute-binding family 5 protein                                         | BAB2_0974 | 1.6392 | 1.5769 | 0.974  | 1.0107 |
| gi 82700580 | F0F1 ATP synthase subunit gamma                                         | BAB1_1808 | 0.9861 | 1.0233 | 1.0314 | 0.9942 |
| gi 82700644 | aspartate kinase                                                        | BAB1_1874 | 1.035  | 1.0209 | 0.9697 | 0.9824 |
| gi 82700206 | acetolactate synthase 3 catalytic subunit                               | BAB1_1408 | 0.8976 | 0.9179 | 1.0313 | 1.0074 |
| gi 82700103 | aminotransferase                                                        | BAB1_1294 | 1.0171 | 1.0935 | 1.0371 | 0.9643 |
| gi 82699974 | CTP synthetase                                                          | BAB1_1157 | 0.9778 | 1.0328 | 1.0466 | 0.9902 |
| gi 82699466 | transcriptional regulatory protein MucR                                 | BAB1_0594 | 0.887  | 0.9804 | 1.0361 | 0.9364 |
| gi 82699937 | peptidyl-prolyl cis-trans isomerase, cyclophilin type                   | BAB1_1118 | 1.0489 | 1.0881 | 1.0126 | 0.9746 |
| gi 82700582 | F0F1 ATP synthase subunit delta                                         | BAB1_1810 | 1.0475 | 0.9905 | 0.9738 | 1.0295 |
| gi 82699863 | aminoacyl-tRNA synthetase, class I:DAHP synthetase, classII             | BAB1_1031 | 1      | 0.9478 | 0.9973 | 1.0512 |
| gi 82699583 | nucleoside diphosphate kinase                                           | BAB1_0715 | 0.8805 | 0.959  | 1.085  | 0.9944 |
| gi 82699846 | methionyl-tRNA synthetase                                               | BAB1_1014 | 0.9754 | 1.0009 | 1.0081 | 0.9821 |
| gi 82700731 | electron transfer flavoprotein subunit beta                             | BAB1_1972 | 1.0484 | 0.9856 | 0.9243 | 0.9838 |
| gi 83269436 | solute-binding family 1 protein                                         | BAB2_0539 | 1.1445 | 1.2274 | 0.9891 | 0.9222 |
| gi 82700078 | 50S ribosomal protein L10                                               | BAB1_1266 | 1.0083 | 1.001  | 0.9732 | 0.98   |
| gi 82699366 | 30S ribosomal protein S6                                                | BAB1_0480 | 1.1425 | 1.0488 | 0.9752 | 1.0624 |
| gi 82699385 | Alkyl hydroperoxide reductase/ Thiol specific antioxidant/ Mal allergen | BAB1_0504 | 0.9901 | 0.9948 | 0.992  | 0.9876 |
| gi 83269064 | solute-binding family 1 protein                                         | BAB2_0113 | 1.9141 | 1.7258 | 0.9396 | 1.0388 |
| gi 82700827 | preprotein translocase subunit SecB                                     | BAB1_2073 | 1.0043 | 1.0686 | 1.0188 | 0.9577 |
| gi 82699402 | DSBA oxidoreductase:twin-arginine translocation pathway signal          | BAB1_0521 | 1.0251 | 0.9295 | 0.9182 | 1.0121 |
| gi 83269024 | UTP-glucose-1-phosphate uridylyltransferase:nucleotidyl transferase     | BAB2_0070 | 0.9686 | 1.0011 | 1.0139 | 0.9804 |
| gi 82699211 | arginine/ornithine transport operon protein aot                         | BAB1_0317 | 1.0308 | 1.0031 | 1.0338 | 1.0675 |
| gi 82699639 | delta-aminolevulinic acid dehydratase                                   | BAB1_0780 | 1.0534 | 1.023  | 0.9654 | 0.9936 |
| gi 83269846 | NADH-ubiquinone oxidoreductase 39 kd subunit                            | BAB2_1002 | 1.0513 | 1.0127 | 0.9482 | 0.9847 |
| gi 82700324 | cold shock DNA-binding domain-containing protein                        | BAB1_1532 | 0.9458 | 0.9168 | 0.9822 | 1.0126 |
| gi 82700642 | peptide chain release factor 1                                          | BAB1_1872 | 0.9866 | 1.0601 | 0.9973 | 0.9275 |
| gi 82699978 | triosephosphate isomerase                                               | BAB1_1161 | 0.922  | 1.0189 | 1.0583 | 0.9577 |
| gi 82699669 | 30S ribosomal protein S9                                                | BAB1_0810 | 0.9322 | 0.9875 | 1.0472 | 0.9874 |
| gi 82699260 | invasion protein B                                                      | BAB1_0368 | 1.0621 | 1.0567 | 0.9315 | 0.9366 |
| gi 82700643 | PEP-utilizing protein                                                   | BAB1_1873 | 1.0088 | 0.9436 | 0.9931 | 1.0608 |
| gi 83269759 | nitrate reductase alpha subunit                                         | BAB2_0904 | 0.9289 | 1.0015 | 1.0729 | 0.9934 |
| gi 82699001 | hypothetical protein BAB1_0075                                          | BAB1_0075 | 1.02   | 1.0094 | 0.9665 | 0.9758 |
| gi 82699286 | hypothetical protein BAB1_0400                                          | BAB1_0400 | 1.0576 | 1.015  | 0.9689 | 1.0085 |
| gi 82700080 | 50S ribosomal protein L11                                               | BAB1_1268 | 1.0144 | 0.9989 | 0.9817 | 0.9963 |
| gi 82699633 | 3'-5' exonuclease                                                       | BAB1_0774 | 0.968  | 0.9717 | 1.025  | 1.0204 |
| gi 82699133 | substrate-binding region of ABC-type glycine betaine transport system   | BAB1_0226 | 1.0415 | 0.8909 | 0.8905 | 1.0413 |
| gi 82699221 | hypothetical protein BAB1_0327                                          | BAB1_0327 | 0.9769 | 0.9597 | 1.01   | 1.0272 |
| gi 82699238 | alpha/beta fold hydrolase                                               | BAB1_0344 | 1.0558 | 1.0562 | 1.0363 | 1.0354 |
| gi 82699316 | TPR repeat-containing protein                                           | BAB1_0430 | 1.1214 | 0.9755 | 0.9148 | 1.0505 |
| gi 83269528 | metal-dependent hydrolase                                               | BAB2_0644 | 1.0387 | 0.9408 | 0.9284 | 1.0246 |
| gi 82699875 | hypothetical protein BAB1_1043                                          | BAB1_1043 | 0.9932 | 0.994  | 0.9821 | 0.9805 |

## SUPPLEMENTARY MATERIAL

|             |                                                                        |           |        |        |        |        |
|-------------|------------------------------------------------------------------------|-----------|--------|--------|--------|--------|
| gi 82699868 | malic enzyme                                                           | BAB1_1036 | 1.0057 | 1.0133 | 1.0273 | 1.0184 |
| gi 82699463 | manganese and iron superoxide dismutase                                | BAB1_0591 | 1.1352 | 1.0329 | 0.8866 | 0.9747 |
| gi 82699556 | dihydroorotase                                                         | BAB1_0688 | 0.9431 | 0.932  | 1.017  | 1.0293 |
| gi 82699979 | peptidyl-prolyl cis-trans isomerase D                                  | BAB1_1162 | 1.0098 | 0.954  | 0.9496 | 1.0042 |
| gi 83269822 | 3-ketoacyl-(acyl-carrier-protein) reductase                            | BAB2_0975 | 1.2022 | 1.2485 | 1.0233 | 0.9841 |
| gi 82700518 | phosphoglycerate kinase                                                | BAB1_1742 | 1.0372 | 1.0472 | 1.0078 | 0.9983 |
| gi 82699739 | nicotinate-nucleotide--dimethylbenzimidazole phosphoribosyltransferase | BAB1_0886 | 0.9773 | 0.9772 | 0.9892 | 0.9884 |
| gi 82699333 | enoyl-(acyl carrier protein) reductase                                 | BAB1_0447 | 0.9693 | 1.0094 | 0.9965 | 0.9572 |
| gi 82699683 | NADH dehydrogenase subunit E                                           | BAB1_0826 | 1.0071 | 0.9641 | 0.9849 | 1.0298 |
| gi 82699800 | ABC transporter ATPase                                                 | BAB1_0949 | 1.063  | 1.0571 | 0.9824 | 0.9874 |
| gi 82699681 | NADH dehydrogenase subunit C                                           | BAB1_0824 | 1.015  | 1.008  | 0.992  | 0.9983 |
| gi 83269265 | aspartate-semialdehyde dehydrogenase                                   | BAB2_0349 | 1.0079 | 1.0558 | 1.0518 | 1.0041 |
| gi 82700882 | glutathione synthetase                                                 | BAB1_2135 | 0.9696 | 0.9726 | 1.0148 | 1.0107 |
| gi 82699597 | hypothetical protein BAB1_0729                                         | BAB1_0729 | 0.9916 | 0.9383 | 0.9935 | 1.049  |
| gi 83269350 | lysyl-tRNA synthetase                                                  | BAB2_0447 | 0.9596 | 1.0118 | 1.0504 | 0.9947 |
| gi 83269431 | alkylhydroperoxidase                                                   | BAB2_0532 | 0.9139 | 0.9602 | 1.0346 | 0.984  |
| gi 82700046 | adenylate kinase                                                       | BAB1_1234 | 1.1437 | 1.0576 | 0.9721 | 1.0524 |
| gi 82700834 | ATP-dependent protease ATP-binding subunit                             | BAB1_2080 | 1.0574 | 1.0031 | 0.9462 | 0.997  |
| gi 83269345 | sugar transporter family protein                                       | BAB2_0442 | 0.9814 | 0.9467 | 0.998  | 1.0342 |
| gi 82699904 | thiosulfate sulfurtransferase:rhodanese-like                           | BAB1_1075 | 0.9167 | 0.9741 | 1.046  | 0.9834 |
| gi 83269034 | peptidase M3:neutral zinc metallopeptidases, zinc-binding region       | BAB2_0080 | 0.9923 | 0.9772 | 0.9709 | 0.9848 |
| gi 83269583 | solute-binding family 5 protein                                        | BAB2_0700 | 1.8119 | 1.7648 | 0.9362 | 0.9645 |
| gi 82700239 | TPR repeat-containing protein                                          | BAB1_1441 | 1.0952 | 1.0393 | 1.0054 | 1.0537 |
| gi 82699369 | 3-ketoacyl-(acyl-carrier-protein) reductase                            | BAB1_0483 | 0.9754 | 1.0105 | 0.9986 | 0.9637 |
| gi 82699855 | glutamine synthetase class-I                                           | BAB1_1023 | 1.0069 | 1.0261 | 1.0087 | 0.9891 |
| gi 82700877 | cytochrome c heme-binding domain-containing protein                    | BAB1_2130 | 1.1635 | 1.0804 | 0.9562 | 1.0289 |
| gi 82699783 | glycosyl transferase family 51 protein                                 | BAB1_0932 | 0.9045 | 0.9813 | 1.0473 | 0.9636 |
| gi 82699969 | dehydrogenase, E1 component:mitochondrial substrate carrier            | BAB1_1152 | 1.2136 | 1.1593 | 0.9658 | 1.0098 |
| gi 82700808 | hypothetical protein BAB1_2054                                         | BAB1_2054 | 1.0486 | 1.0894 | 0.9979 | 0.9579 |
| gi 82699208 | putative oxidoreductase                                                | BAB1_0314 | 7.7003 | 7.2893 | 1.1762 | 1.0517 |
| gi 82700048 | 50S ribosomal protein L15                                              | BAB1_1236 | 0.9119 | 0.9819 | 1.0408 | 0.9662 |
| gi 83269741 | hypothetical protein BAB2_0880                                         | BAB2_0880 | 1.1215 | 0.9895 | 0.9088 | 1.0316 |
| gi 83269699 | putative phosphoketolase                                               | BAB2_0836 | 1.0805 | 0.9473 | 0.9157 | 1.043  |
| gi 82700666 | 2-octaprenyl-6-methoxyphenyl hydroxylase                               | BAB1_1898 | 0.9262 | 0.953  | 1.0605 | 1.0298 |
| gi 82699548 | signal peptidase S26A:Signal peptidase                                 | BAB1_0680 | 0.996  | 0.9437 | 0.9364 | 0.9886 |
| gi 82700655 | porphobilinogen deaminase                                              | BAB1_1887 | 1.0071 | 0.9769 | 1.012  | 1.0421 |
| gi 82699670 | 50S ribosomal protein L13                                              | BAB1_0811 | 0.9772 | 1.0526 | 1.042  | 0.9665 |
| gi 83269499 | glutamate-binding protein                                              | BAB2_0612 | 8.6175 | 8.4049 | 1.0435 | 1.0205 |
| gi 83269346 | acetyl-CoA acetyltransferase                                           | BAB2_0443 | 0.9458 | 0.9473 | 1.0007 | 1      |
| gi 82700217 | hypothetical protein BAB1_1419                                         | BAB1_1419 | 1.1009 | 0.9962 | 0.919  | 1.0122 |
| gi 83269559 | Ferritin:bacterioferritin                                              | BAB2_0675 | 0.8245 | 0.9126 | 1.0326 | 0.9318 |
| gi 82700906 | S-adenosylmethionine synthetase                                        | BAB1_2160 | 0.9693 | 1.0494 | 1.0649 | 0.9835 |
| gi 83269586 | ABC transporter ATPase                                                 | BAB2_0703 | 1.3633 | 1.2726 | 0.9299 | 0.9957 |

SUPPLEMENTARY MATERIAL

|             |                                                                          |           |        |        |        |        |
|-------------|--------------------------------------------------------------------------|-----------|--------|--------|--------|--------|
| gi 83269259 | thioredoxin domain-containing protein                                    | BAB2_0343 | 1.2074 | 1.1412 | 0.9699 | 1.0246 |
| gi 82699574 | peptidyl-prolyl cis-trans isomerase, putative                            | BAB1_0706 | 0.9611 | 1.0009 | 1.024  | 0.9818 |
| gi 82699948 | histone-like DNA-binding protein                                         | BAB1_1129 | 1.0953 | 1.1424 | 1.0392 | 0.9966 |
| gi 83269545 | transcription repair coupling factor                                     | BAB2_0661 | 0.9826 | 1.0207 | 1.0278 | 0.9886 |
| gi 82699391 | threonine synthase                                                       | BAB1_0510 | 1.0499 | 1.0299 | 0.9292 | 0.9469 |
| gi 82700485 | translocation protein TolB                                               | BAB1_1709 | 1.0482 | 0.9624 | 0.8981 | 0.978  |
| gi 83269533 | DNA topoisomerase IV subunit B                                           | BAB2_0649 | 0.9611 | 1.0079 | 1.0232 | 0.9755 |
| gi 83269845 | GTP-binding protein LepA                                                 | BAB2_1001 | 1.0061 | 1.005  | 1.0139 | 1.0139 |
| gi 83269790 | periplasmic binding protein/LacI transcriptional regulator               | BAB2_0938 | 0.782  | 0.7409 | 0.9212 | 0.971  |
| gi 82699187 | UDP-N-acetylglucosamine 1-carboxyvinyltransferase                        | BAB1_0287 | 1.0498 | 1.0458 | 0.9662 | 0.9685 |
| gi 83269661 | D-3-phosphoglycerate dehydrogenase                                       | BAB2_0783 | 1.0364 | 0.9559 | 0.977  | 1.0569 |
| gi 82700469 | basic-leucine zipper (bZIP) transcription factor                         | BAB1_1693 | 0.8827 | 0.9697 | 1.0553 | 0.961  |
| gi 82699936 | peptidyl-prolyl cis-trans isomerase                                      | BAB1_1117 | 1.0418 | 0.9731 | 0.9638 | 1.034  |
| gi 82699300 | F0F1 ATP synthase subunit B                                              | BAB1_0414 | 1.0119 | 1.0054 | 1.0131 | 1.0199 |
| gi 83269246 | aldehyde dehydrogenase                                                   | BAB2_0327 | 1.383  | 1.3782 | 1.0275 | 1.033  |
| gi 82700345 | translation-associated GTPase                                            | BAB1_1553 | 1.0666 | 1.0352 | 0.9728 | 1.0019 |
| gi 82699230 | 2'-deoxycytidine 5'-triphosphate deaminase                               | BAB1_0336 | 0.9189 | 0.9517 | 1.0334 | 0.9962 |
| gi 82700730 | antifreeze protein, type I:electron transfer flavoprotein, alpha subunit | BAB1_1971 | 0.9705 | 0.9728 | 0.9878 | 0.9844 |
| gi 82699368 | malonyl CoA-acyl carrier protein transacylase                            | BAB1_0482 | 0.9813 | 0.9835 | 0.9894 | 0.9866 |
| gi 83269868 | protein kinase:ABC1 protein                                              | BAB2_1025 | 0.9549 | 1.0243 | 1.0438 | 0.9738 |
| gi 82700813 | ParB-like nuclease:ParB-like partition protein                           | BAB1_2059 | 1.0116 | 1.0188 | 0.9392 | 0.9317 |
| gi 83269479 | Renal dipeptidase                                                        | BAB2_0586 | 0.9576 | 0.9949 | 1.0191 | 0.9809 |
| gi 83269412 | glycine cleavage system aminomethyltransferase T                         | BAB2_0513 | 1.1077 | 1.1297 | 1.0388 | 1.0169 |
| gi 82700747 | histidinol-phosphate aminotransferase                                    | BAB1_1988 | 0.8789 | 0.8948 | 0.9998 | 0.9818 |
| gi 82699608 | hypothetical protein BAB1_0740                                           | BAB1_0740 | 0.9817 | 1.017  | 0.9972 | 0.962  |
| gi 82698934 | DNA polymerase III subunit beta                                          | BAB1_0002 | 1.1071 | 0.9491 | 0.961  | 1.1221 |
| gi 82700908 | hypothetical protein BAB1_2162                                           | BAB1_2162 | 0.9931 | 0.9922 | 0.9703 | 0.9703 |
| gi 82700673 | isopropylmalate isomerase large subunit                                  | BAB1_1905 | 1.1344 | 1.0237 | 0.9904 | 1.0966 |
| gi 82699725 | glucose/ribitol dehydrogenase                                            | BAB1_0871 | 0.9515 | 0.9899 | 1.0159 | 0.9759 |
| gi 82700109 | methionine aminopeptidase                                                | BAB1_1300 | 1.1168 | 1.0009 | 0.9465 | 1.0555 |
| gi 82699717 | hypothetical protein BAB1_0863                                           | BAB1_0863 | 1.0524 | 0.9579 | 0.9481 | 1.0405 |
| gi 82699644 | peptidoglycan binding domain-containing protein                          | BAB1_0785 | 0.9785 | 1.1328 | 1.1196 | 0.9668 |
| gi 82700602 | 30S ribosomal protein S16                                                | BAB1_1832 | 1.1017 | 1.0286 | 0.9235 | 0.9881 |
| gi 82700358 | coproporphyrinogen III oxidase                                           | BAB1_1566 | 0.887  | 0.9853 | 1.0524 | 0.9456 |
| gi 82698965 | cytochrome c heme-binding site:cytochrome c                              | BAB1_0036 | 1.1092 | 0.9236 | 0.9316 | 1.12   |
| gi 83269287 | glycerol-3-phosphate dehydrogenase                                       | BAB2_0371 | 0.8821 | 0.9084 | 1.0324 | 1.0017 |
| gi 82699834 | glycosyl transferase, group 1                                            | BAB1_1000 | 1.0903 | 1.0314 | 0.9277 | 0.9796 |
| gi 82700729 | 3-hydroxybutyryl-CoA dehydrogenase                                       | BAB1_1970 | 1.0282 | 0.978  | 0.9536 | 1.002  |
| gi 83269478 | solute-binding family 1 protein                                          | BAB2_0585 | 1.1416 | 1.0884 | 0.9962 | 1.044  |
| gi 82700376 | anthranilate synthase                                                    | BAB1_1586 | 0.9736 | 0.9433 | 0.9973 | 1.028  |
| gi 82700315 | transcription elongation factor GreA                                     | BAB1_1523 | 0.999  | 0.9109 | 0.9148 | 1.0027 |
| gi 82699315 | polyprenyl synthetase                                                    | BAB1_0429 | 0.9857 | 0.9699 | 0.9841 | 1      |
| gi 82699821 | fumarate lyase:Fe-S type hydro-lyase tartrate                            | BAB1_0977 | 1.3168 | 1.2508 | 0.9731 | 1.0236 |

SUPPLEMENTARY MATERIAL

|             |                                                               |           |        |        |        |        |
|-------------|---------------------------------------------------------------|-----------|--------|--------|--------|--------|
| gi 82700789 | acetyl-CoA carboxylase carboxyltransferase subunit alpha      | BAB1_2033 | 0.9783 | 0.9981 | 0.9981 | 0.9777 |
| gi 82700607 | carbonic anhydrase                                            | BAB1_1837 | 0.9835 | 0.9796 | 0.996  | 0.9995 |
| gi 82699599 | phosphoribosylaminoimidazole synthetase                       | BAB1_0731 | 1.0814 | 1.0156 | 1.0371 | 1.1054 |
| gi 82700235 | M24 family metalloproteinase                                  | BAB1_1437 | 1.0729 | 0.9225 | 0.879  | 1.0211 |
| gi 82699951 | ATP-dependent Clp protease proteolytic subunit                | BAB1_1132 | 1.0436 | 1.0167 | 0.9821 | 1.008  |
| gi 82700063 | 30S ribosomal protein S19                                     | BAB1_1251 | 1.0405 | 1.089  | 1.0275 | 0.9808 |
| gi 83269221 | D-amino acid aminotransferase                                 | BAB2_0301 | 0.9987 | 0.9864 | 1.0427 | 1.055  |
| gi 83269379 | glutamate--cysteine ligase, plant                             | BAB2_0476 | 0.9067 | 0.9765 | 1.0351 | 0.9608 |
| gi 83269813 | dihydrodipicolinate synthetase                                | BAB2_0961 | 1.0652 | 1.1624 | 1.0631 | 0.9746 |
| gi 82700874 | phenylalanyl-tRNA synthetase subunit beta                     | BAB1_2127 | 0.9788 | 0.9908 | 1.0029 | 0.9906 |
| gi 82699812 | Outer membrane efflux protein                                 | BAB1_0963 | 1.1442 | 1.085  | 0.9657 | 1.0173 |
| gi 82700871 | 50S ribosomal protein L20                                     | BAB1_2124 | 1.0353 | 0.9986 | 0.9701 | 1.005  |
| gi 82699998 | ribosome recycling factor                                     | BAB1_1181 | 0.9983 | 1.0324 | 0.9704 | 0.9375 |
| gi 83269731 | hypothetical protein BAB2_0868                                | BAB2_0868 | 1.017  | 0.9665 | 0.9858 | 1.0368 |
| gi 82699755 | seryl-tRNA synthetase                                         | BAB1_0904 | 1.0011 | 1.0013 | 1.008  | 1.0066 |
| gi 82700672 | GCN5-related N-acetyltransferase                              | BAB1_1904 | 0.9128 | 0.9489 | 0.9762 | 0.9395 |
| gi 82700042 | 50S ribosomal protein L17                                     | BAB1_1230 | 1.0337 | 1.0524 | 1.0514 | 1.0319 |
| gi 82700473 | D-3-phosphoglycerate dehydrogenase                            | BAB1_1697 | 0.9099 | 0.9439 | 1.0081 | 0.9715 |
| gi 82699461 | ErfK/YbiS/YcfS/YnhG:twi-arginine translocation pathway signal | BAB1_0589 | 1.0064 | 0.9591 | 0.9633 | 1.01   |
| gi 82700591 | acetyl-CoA synthetase                                         | BAB1_1819 | 0.7863 | 0.8698 | 1.092  | 0.9861 |
| gi 82700873 | phenylalanyl-tRNA synthetase subunit alpha                    | BAB1_2126 | 1.0011 | 1.0436 | 1.0034 | 0.9622 |
| gi 82700062 | 50S ribosomal protein L22                                     | BAB1_1250 | 1.0513 | 1.0071 | 0.9747 | 1.0185 |
| gi 83269869 | ubiquinone/menaquinone biosynthesis methyltransferase         | BAB2_1026 | 1.0134 | 0.9953 | 1.0161 | 1.0332 |
| gi 82700414 | solute-binding family 1 protein                               | BAB1_1628 | 1.1883 | 1.1187 | 0.9539 | 1.0121 |
| gi 83269711 | catalase                                                      | BAB2_0848 | 0.9351 | 0.9884 | 1.031  | 0.9752 |
| gi 83269542 | D-fructose-6-phosphate amidotransferase                       | BAB2_0658 | 0.9817 | 1.0314 | 1.1018 | 1.0482 |
| gi 82699792 | Alkyl hydroperoxide reductase                                 | BAB1_0941 | 0.9956 | 1.012  | 1.0324 | 1.0185 |
| gi 82700341 | ribose-phosphate pyrophosphokinase                            | BAB1_1549 | 1.0672 | 1.0092 | 0.9645 | 1.0191 |
| gi 82700920 | 3-hydroxydecanoyl-(acyl carrier protein) dehydratase          | BAB1_2174 | 1.0783 | 1.0107 | 0.9314 | 0.9934 |
| gi 82698937 | pyridine nucleotide-disulphide oxidoreductase                 | BAB1_0005 | 0.9456 | 1.0053 | 1.0516 | 0.989  |
| gi 83269812 | malate/L-lactate dehydrogenase                                | BAB2_0960 | 1.0113 | 1.0579 | 0.9972 | 0.9518 |
| gi 82700198 | transcriptional regulator TetR                                | BAB1_1400 | 0.86   | 0.829  | 0.9749 | 1.0106 |
| gi 83269609 | cytochrome bd ubiquinol oxidase, subunit I                    | BAB2_0728 | 0.9384 | 0.9578 | 0.9914 | 0.9716 |
| gi 82700606 | lytic murein transglycosylase, putative                       | BAB1_1836 | 0.9608 | 1.2043 | 1.095  | 0.873  |
| gi 82699317 | glycyl-tRNA synthetase subunit alpha                          | BAB1_0431 | 0.891  | 0.96   | 1.0621 | 0.9857 |
| gi 83269307 | DEAD/DEAH box helicase:helicase                               | BAB2_0395 | 0.9805 | 0.9668 | 0.9922 | 1.0085 |
| gi 82699299 | F0F1 ATP synthase subunit B'                                  | BAB1_0413 | 1.0297 | 0.9888 | 0.9501 | 0.9889 |
| gi 82700432 | aldehyde dehydrogenase                                        | BAB1_1655 | 1.0641 | 1.0176 | 0.9837 | 1.0278 |
| gi 82699649 | riboflavin synthase subunit alpha                             | BAB1_0790 | 0.9873 | 0.9746 | 0.991  | 1.0029 |
| gi 82699226 | ornithine carbamoyltransferase                                | BAB1_0332 | 0.9995 | 1.0136 | 1.0491 | 1.0355 |
| gi 82699066 | SAM dependent methyltransferase, putative                     | BAB1_0150 | 0.9831 | 1.0007 | 1.0116 | 0.9928 |
| gi 82699906 | Acetyl-CoA hydrolase/transferase                              | BAB1_1077 | 1.227  | 1.0672 | 0.9141 | 1.0501 |
| gi 82700056 | 50S ribosomal protein L24                                     | BAB1_1244 | 1.2044 | 1.0121 | 0.946  | 1.1214 |

SUPPLEMENTARY MATERIAL

|              |                                                                           |           |        |        |        |        |
|--------------|---------------------------------------------------------------------------|-----------|--------|--------|--------|--------|
| gi 82700863  | tryptophan synthase subunit beta                                          | BAB1_2112 | 1.045  | 1.0386 | 1.0236 | 1.0289 |
| gi 82700658  | YciI-like protein                                                         | BAB1_1890 | 1.0448 | 1.0812 | 1.0028 | 0.9686 |
| gi 82700475  | phosphoserine aminotransferase                                            | BAB1_1699 | 0.9178 | 0.9629 | 1.0026 | 0.9555 |
| gi 82699780  | 1-aminocyclopropane-1-carboxylate synthase:aminotransferase               | BAB1_0929 | 1.0296 | 0.9927 | 0.9427 | 0.9769 |
| gi 82699776  | acetyl-CoA carboxylase biotin carboxyl carrier protein subunit            | BAB1_0925 | 1.0062 | 1.0141 | 0.9862 | 0.9769 |
| gi 82699057  | nitrogen-fixing NifU, C-terminal                                          | BAB1_0139 | 0.9873 | 0.9855 | 0.969  | 0.9696 |
| gi 83269856  | dihydrodipicolinate reductase                                             | BAB2_1012 | 1.037  | 0.9545 | 0.9392 | 1.0215 |
| gi 83269142  | hypothetical protein BAB2_0207                                            | BAB2_0207 | 0.9552 | 0.9428 | 1.0156 | 1.0279 |
| gi 82700478  | phosphoglucomutase/phosphomannomutase                                     | BAB1_1702 | 1.0919 | 1.0071 | 1.0286 | 1.1142 |
| gi 82700446  | PAS domain-containing protein                                             | BAB1_1669 | 0.9497 | 0.9615 | 1.0415 | 1.0281 |
| gi 82700404  | DegT/DnrJ/EryC1/StrS aminotransferase                                     | BAB1_1616 | 1.1061 | 1.0823 | 0.9567 | 0.9781 |
| gi 82700044  | 30S ribosomal protein S11                                                 | BAB1_1232 | 1.1289 | 1.0277 | 0.9246 | 1.0185 |
| gi 82699992  | UDP-3-O-[3-hydroxymyristoyl] glucosamine N-acyltransferase                | BAB1_1175 | 0.9514 | 0.9871 | 1.0238 | 0.9859 |
| gi 162002881 | uracil phosphoribosyltransferase                                          | BAB2_1027 | 0.9265 | 0.9654 | 1.0578 | 1.0147 |
| gi 82700402  | response regulator receiver:transcriptional regulatory protein            | BAB1_1614 | 1.05   | 1.0251 | 0.9674 | 0.9884 |
| gi 82700179  | urease accessory protein UreG                                             | BAB1_1381 | 1.132  | 1.0104 | 0.9865 | 1.1056 |
| gi 82699833  | glycosyltransferase                                                       | BAB1_0999 | 0.9853 | 1.0261 | 0.9958 | 0.9555 |
| gi 82700036  | recombinase A                                                             | BAB1_1224 | 0.9961 | 0.9748 | 0.9692 | 0.9898 |
| gi 83268979  | Leu/Ile/Val-binding family protein                                        | BAB2_0023 | 0.9275 | 0.8566 | 0.9118 | 0.9885 |
| gi 83269231  | D-amino acid dehydrogenase small subunit                                  | BAB2_0311 | 1.0529 | 1.0894 | 0.9974 | 0.9631 |
| gi 82700205  | acetolactate synthase 3 regulatory subunit                                | BAB1_1407 | 0.9663 | 0.9724 | 1.0266 | 1.0192 |
| gi 83269878  | aldehyde dehydrogenase                                                    | BAB2_1035 | 1.7454 | 1.8269 | 1.0584 | 1.0102 |
| gi 82699749  | glycoside hydrolase family protein                                        | BAB1_0898 | 1.0689 | 0.985  | 0.9479 | 1.0275 |
| gi 83269007  | glutamate synthase glutamate synthase amidotransferase subunit            | BAB2_0053 | 0.9732 | 0.965  | 1.0032 | 1.011  |
| gi 83269262  | 3-isopropylmalate dehydrogenase                                           | BAB2_0346 | 1.0689 | 1.0451 | 0.9992 | 1.0213 |
| gi 82700310  | pyridine nucleotide-disulphide oxidoreductase class-II                    | BAB1_1518 | 0.9815 | 1.0559 | 1.0469 | 0.972  |
| gi 83269347  | fatty oxidation complex alpha subunit                                     | BAB2_0444 | 0.9192 | 0.9612 | 1.0206 | 0.9752 |
| gi 83269831  | putative inner membrane protein translocase component YidC                | BAB2_0986 | 1.0441 | 1.0058 | 0.908  | 0.942  |
| gi 82699341  | 3,4-dihydroxy-2-butanone 4-phosphate synthase                             | BAB1_0455 | 0.975  | 1.0021 | 1.0004 | 0.9729 |
| gi 83269732  | secretion protein HlyD                                                    | BAB2_0869 | 1.125  | 0.9877 | 1.0117 | 1.1531 |
| gi 82699659  | MerR family regulatory protein                                            | BAB1_0800 | 1.0693 | 0.9662 | 0.9537 | 1.0544 |
| gi 82700628  | 50S ribosomal protein L21                                                 | BAB1_1858 | 1.0357 | 0.9526 | 0.9536 | 1.0358 |
| gi 83269744  | ATPase                                                                    | BAB2_0883 | 1.0582 | 1.0503 | 0.976  | 0.9831 |
| gi 82699565  | cysteinyI-tRNA synthetase                                                 | BAB1_0697 | 0.8517 | 1.0096 | 1.106  | 0.9328 |
| gi 83269718  | phosphoglucomutase/phosphomannomutase                                     | BAB2_0855 | 0.9044 | 1.0686 | 1.1448 | 0.9666 |
| gi 82700556  | acetyl-CoA acetyltransferase                                              | BAB1_1783 | 1.0302 | 1.021  | 1.0181 | 1.0264 |
| gi 82699332  | heat shock protein DnaJ                                                   | BAB1_0446 | 1.1325 | 1.0501 | 0.9459 | 1.0177 |
| gi 82700072  | 30S ribosomal protein S12                                                 | BAB1_1260 | 1.1165 | 1.0658 | 0.9463 | 0.9911 |
| gi 82700247  | UDP-N-acetylmuramate--L-alanine ligase                                    | BAB1_1449 | 0.9424 | 1.0299 | 1.0694 | 0.9795 |
| gi 82699727  | 3-oxoacyl-(acyl carrier protein) synthase II                              | BAB1_0873 | 1.0022 | 1.0762 | 1.1125 | 1.0326 |
| gi 82699311  | Clp protease:peptidase U7:Na <sup>+</sup> /H <sup>+</sup> antiporter NhaA | BAB1_0425 | 0.9643 | 0.9749 | 0.9941 | 0.9825 |
| gi 82699888  | hypothetical protein BAB1_1058                                            | BAB1_1058 | 0.9469 | 1.0611 | 1.1168 | 0.9951 |
| gi 83269703  | membrane antigen, putative                                                | BAB2_0840 | 0.9496 | 0.9243 | 1.0022 | 1.0322 |



SUPPLEMENTARY MATERIAL

|              |                                                           |           |        |        |        |        |
|--------------|-----------------------------------------------------------|-----------|--------|--------|--------|--------|
| gi 162002879 | tryptophanyl-tRNA synthetase                              | BAB1_0141 | 0.9308 | 1.0455 | 1.1332 | 1.011  |
| gi 82699373  | hypothetical protein BAB1_0487                            | BAB1_0487 | 0.9331 | 1.1552 | 1.1074 | 0.8945 |
| gi 82699866  | glutamyl-tRNA synthetase                                  | BAB1_1034 | 1.1775 | 1.0625 | 0.9375 | 1.0399 |
| gi 83269251  | NADH:flavin oxidoreductase/NADH oxidase                   | BAB2_0335 | 1.0844 | 1.0027 | 0.9229 | 0.9972 |
| gi 83269430  | Alkyl hydroperoxide reductase                             | BAB2_0531 | 0.9496 | 0.9322 | 0.98   | 0.9978 |
| gi 83269725  | acid-resistance protein                                   | BAB2_0862 | 0.9779 | 0.9333 | 0.9719 | 1.0177 |
| gi 82700525  | hypothetical protein BAB1_1749                            | BAB1_1749 | 0.9815 | 1.0367 | 1.0435 | 0.9875 |
| gi 82699667  | N-acetyl-gamma-glutamyl-phosphate reductase               | BAB1_0808 | 0.9087 | 0.9213 | 1.0615 | 1.0453 |
| gi 82700313  | AsnC family regulatory protein                            | BAB1_1521 | 0.9651 | 1.0265 | 1.0431 | 0.9795 |
| gi 82700058  | 30S ribosomal protein S17                                 | BAB1_1246 | 1.1185 | 1.1375 | 1.0491 | 1.0331 |
| gi 82698951  | hypothetical protein BAB1_0022                            | BAB1_0022 | 1.015  | 0.9792 | 0.9579 | 0.9937 |
| gi 82700853  | ATP/GTP-binding protein                                   | BAB1_2102 | 0.9624 | 0.9591 | 1.0208 | 1.0233 |
| gi 82700505  | hypothetical protein BAB1_1729                            | BAB1_1729 | 1.0471 | 1.0396 | 1.0088 | 1.0152 |
| gi 82700824  | shikimate 5-dehydrogenase                                 | BAB1_2070 | 0.9971 | 0.964  | 1.002  | 1.0359 |
| gi 83269005  | low-specificity threonine aldolase                        | BAB2_0051 | 1.0065 | 1.0138 | 1.0164 | 1.0079 |
| gi 82699947  | excinuclease ABC subunit A                                | BAB1_1128 | 1.1162 | 1.0315 | 0.9888 | 1.0691 |
| gi 82700028  | tetracycline resistance protein TetB                      | BAB1_1216 | 1.2141 | 1.1548 | 0.9718 | 1.0226 |
| gi 82700895  | metalloprotease (M29)                                     | BAB1_2149 | 0.9888 | 0.9696 | 0.9589 | 0.9773 |
| gi 82700821  | uroporphyrinogen decarboxylase                            | BAB1_2067 | 1.0317 | 1.006  | 1.0319 | 1.0574 |
| gi 82700858  | thioredoxin domain-containing protein                     | BAB1_2107 | 1.3659 | 1.1685 | 0.9076 | 1.0591 |
| gi 82698938  | ABC transporter ATPase                                    | BAB1_0006 | 1.014  | 0.9621 | 0.9367 | 0.9865 |
| gi 82698972  | hypothetical protein BAB1_0046                            | BAB1_0046 | 0.8783 | 0.9089 | 1.0211 | 0.986  |
| gi 82700504  | 50S ribosomal protein L31                                 | BAB1_1728 | 1.0425 | 1.0308 | 1.0054 | 1.0167 |
| gi 82699243  | 5-aminolevulinate synthase                                | BAB1_0349 | 1.4373 | 1.5532 | 1.0266 | 0.9499 |
| gi 83269283  | triosephosphate isomerase                                 | BAB2_0367 | 1.0018 | 1.0113 | 0.9972 | 0.9873 |
| gi 82700805  | hypothetical protein BAB1_2051                            | BAB1_2051 | 1.0114 | 1.0375 | 1.0873 | 1.0587 |
| gi 82700452  | DNA gyrase, subunit B                                     | BAB1_1675 | 0.9495 | 0.9483 | 0.9902 | 0.9908 |
| gi 82698960  | DNA polymerase III subunits gamma and tau                 | BAB1_0031 | 1.0021 | 0.9957 | 1.0071 | 1.0131 |
| gi 82700772  | 50S ribosomal protein L28                                 | BAB1_2016 | 1.0534 | 1.0668 | 0.9791 | 0.9663 |
| gi 83269271  | ATP/GTP-binding motif-containing protein                  | BAB2_0355 | 0.8632 | 0.928  | 1.1253 | 1.0458 |
| gi 82699135  | glutamate dehydrogenase                                   | BAB1_0228 | 0.9227 | 0.9721 | 1.0375 | 0.9818 |
| gi 83269837  | succinyl-diaminopimelate desuccinylase                    | BAB2_0993 | 1.0129 | 0.9646 | 0.9789 | 1.0273 |
| gi 82700922  | NLPA lipoprotein                                          | BAB1_2176 | 0.9452 | 1.2162 | 1.1184 | 0.8686 |
| gi 82700418  | 7-alpha-hydroxysteroid dehydrogenase                      | BAB1_1634 | 0.9714 | 0.9887 | 1.0139 | 0.9952 |
| gi 82699784  | peptide chain release factor 2                            | BAB1_0933 | 0.9532 | 0.9858 | 1.0104 | 0.9758 |
| gi 83269197  | YaeC family lipoprotein                                   | BAB2_0275 | 1.0392 | 0.972  | 0.999  | 1.0674 |
| gi 82700498  | elongation factor P                                       | BAB1_1722 | 1.0121 | 1.0055 | 0.9649 | 0.9704 |
| gi 83269225  | histidine ammonia-lyase                                   | BAB2_0305 | 0.9937 | 1.028  | 1.0558 | 1.0201 |
| gi 83269835  | hypothetical protein BAB2_0990                            | BAB2_0990 | 0.8997 | 0.958  | 1.0135 | 0.9516 |
| gi 83269739  | spermidine/putrescine ABC transporter ATP-binding protein | BAB2_0878 | 3.1369 | 3.091  | 1.0282 | 1.0195 |
| gi 82699266  | polysaccharide deacetylase                                | BAB1_0375 | 1.2311 | 1.2092 | 1.0096 | 1.0249 |
| gi 82699728  | acyl carrier protein                                      | BAB1_0874 | 1.0662 | 0.8927 | 0.8322 | 0.9928 |
| gi 83269866  | elongation factor Tu                                      | BAB2_1023 | 0.9805 | 1.023  | 1.0499 | 1.0062 |

SUPPLEMENTARY MATERIAL

|             |                                                                |           |        |        |        |        |
|-------------|----------------------------------------------------------------|-----------|--------|--------|--------|--------|
| gi 82699902 | cysteine synthase A                                            | BAB1_1073 | 1.0333 | 1.0297 | 0.9849 | 0.9876 |
| gi 82700868 | translation initiation factor IF-3                             | BAB1_2121 | 1.003  | 1.0426 | 1.0808 | 1.039  |
| gi 82699515 | AMP nucleosidase                                               | BAB1_0647 | 0.9548 | 0.9215 | 0.9734 | 1.0075 |
| gi 83269944 | putative integral membrane protein                             | BAB2_1108 | 1.0407 | 0.9741 | 1.02   | 1.0896 |
| gi 83269695 | GntR family regulatory protein                                 | BAB2_0832 | 0.7629 | 0.7457 | 1.0236 | 1.0452 |
| gi 82700537 | N-formylglutamate amidohydrolase                               | BAB1_1763 | 0.9915 | 0.9377 | 0.9734 | 1.0309 |
| gi 82700483 | outer membrane protein MotY                                    | BAB1_1707 | 1.0262 | 0.9753 | 0.9875 | 1.0399 |
| gi 82700330 | response regulator receiver:transcriptional regulatory protein | BAB1_1538 | 0.9739 | 0.9185 | 0.9148 | 0.9691 |
| gi 82700060 | 50S ribosomal protein L16                                      | BAB1_1248 | 1.0769 | 1.0588 | 0.9411 | 0.9554 |
| gi 82699390 | insulinase-like peptidase                                      | BAB1_0509 | 1.0046 | 0.955  | 0.9976 | 1.0463 |
| gi 83269853 | methylglyoxal synthase                                         | BAB2_1009 | 1.0476 | 0.9623 | 0.9297 | 1.0115 |
| gi 83269253 | arginase:arginase/agmatinase/formiminoglutamase                | BAB2_0337 | 1.0404 | 1.0051 | 0.9989 | 1.0332 |
| gi 83269211 | acetolactate synthase 2 catalytic subunit                      | BAB2_0289 | 1.0517 | 1.0795 | 1.0746 | 1.0455 |
| gi 82700748 | cyclohexadienyl dehydrogenase                                  | BAB1_1989 | 0.8336 | 0.8547 | 1.0492 | 1.0231 |
| gi 82700401 | hypothetical protein BAB1_1613                                 | BAB1_1613 | 0.946  | 1.0227 | 1.0299 | 0.9521 |
| gi 82700283 | hypothetical protein BAB1_1489                                 | BAB1_1489 | 0.7386 | 1.0341 | 1.1756 | 0.8389 |
| gi 82699799 | cysteine desulfurase activator complex subunit SufB            | BAB1_0948 | 1.1323 | 1.1047 | 0.9412 | 0.9641 |
| gi 82699534 | dihydrodipicolinate synthase                                   | BAB1_0666 | 0.9525 | 1.0688 | 1.0594 | 0.9436 |
| gi 82699420 | Formyl transferase, N-terminal                                 | BAB1_0540 | 1.0904 | 1.0435 | 0.9524 | 0.9944 |
| gi 82699076 | phosphoenolpyruvate-dependent sugar phosphotransferase system  | BAB1_0160 | 1.0683 | 1.0718 | 0.9786 | 0.9722 |
| gi 82699054 | response regulator receiver:helix-turn-helix, Fis-type         | BAB1_0136 | 1.0982 | 1.2494 | 1.0548 | 0.9265 |
| gi 83269991 | ParB-like nuclease:ParB-like partition protein                 | BAB2_1164 | 0.989  | 0.9486 | 0.9714 | 1.0118 |
| gi 83269214 | sugar transporter                                              | BAB2_0292 | 1.0694 | 1.1342 | 1.0245 | 0.9652 |
| gi 82700350 | cytochrome b/b6, N-terminal:cytochrome b/b6, C-terminal        | BAB1_1558 | 1.0888 | 0.923  | 0.9309 | 1.0966 |
| gi 82699847 | TatD-related deoxyribonuclease                                 | BAB1_1015 | 0.9534 | 0.9878 | 1.0317 | 0.9962 |
| gi 82699726 | 3-oxoacyl-(acyl carrier protein) synthase II                   | BAB1_0872 | 0.9654 | 0.9537 | 1.0166 | 1.0288 |
| gi 82699422 | ABC transporter ATPase                                         | BAB1_0542 | 1.0325 | 1.0206 | 0.9604 | 0.9708 |
| gi 82699216 | secretion protein HlyD                                         | BAB1_0322 | 0.9071 | 0.9376 | 1.0348 | 1.0002 |
| gi 82699207 | dihydropyrimidine dehydrogenase                                | BAB1_0313 | 4.8148 | 4.5204 | 0.982  | 1.0065 |
| gi 82699182 | translation initiation factor IF-1                             | BAB1_0282 | 0.983  | 0.9922 | 0.9699 | 0.9592 |
| gi 82700111 | hypothetical protein BAB1_1302                                 | BAB1_1302 | 0.7212 | 0.6982 | 1.0443 | 1.078  |
| gi 82699862 | glutathione reductase                                          | BAB1_1030 | 0.9515 | 0.9999 | 1.0619 | 1.0099 |
| gi 82700305 | glutathione S-transferase                                      | BAB1_1513 | 0.9473 | 0.9357 | 0.9498 | 0.9583 |
| gi 83269362 | 6-phosphogluconolactonase                                      | BAB2_0459 | 0.9664 | 0.9861 | 0.9943 | 0.9728 |
| gi 82700004 | glycerophosphoryl diester phosphodiesterase                    | BAB1_1188 | 0.945  | 0.9632 | 0.9981 | 0.978  |
| gi 82699856 | nitrogen regulatory protein P-II:P-II protein urydylation site | BAB1_1024 | 1.0065 | 0.9777 | 0.9663 | 0.9934 |
| gi 82699424 | DegT/DnrJ/EryC1/StrS aminotransferase                          | BAB1_0544 | 0.9537 | 0.9996 | 1.0407 | 0.9924 |
| gi 82700106 | hypothetical protein BAB1_1297                                 | BAB1_1297 | 1.1034 | 1.0029 | 0.9756 | 1.0726 |
| gi 82699913 | nitroreductase family protein                                  | BAB1_1091 | 0.9116 | 0.9148 | 0.9982 | 0.9942 |
| gi 82699653 | SmpA/OmlA                                                      | BAB1_0794 | 0.9819 | 0.973  | 0.9887 | 0.9952 |
| gi 82700065 | 50S ribosomal protein L23                                      | BAB1_1253 | 1.0677 | 1.0187 | 0.9545 | 1      |
| gi 83269394 | extracellular solute-binding protein                           | BAB2_0491 | 4.66   | 4.3517 | 0.9417 | 1.0116 |
| gi 83269984 | Leu/Ile/Val-binding family protein                             | BAB2_1153 | 1.0848 | 0.9674 | 0.8976 | 1.0056 |

## SUPPLEMENTARY MATERIAL

|             |                                                                     |           |        |        |        |        |
|-------------|---------------------------------------------------------------------|-----------|--------|--------|--------|--------|
| gi 82700740 | sodium:dicarboxylate symporter                                      | BAB1_1981 | 1.172  | 1.1216 | 0.9082 | 0.9473 |
| gi 82700098 | glyoxalase/bleomycin resistance protein/dioxygenase                 | BAB1_1286 | 0.93   | 1.0448 | 1.0904 | 0.9699 |
| gi 83269235 | FMN-dependent alpha-hydroxy acid dehydrogenase                      | BAB2_0315 | 0.9992 | 0.9296 | 0.9639 | 1.0348 |
| gi 82699932 | hypothetical protein BAB1_1113                                      | BAB1_1113 | 0.9788 | 0.9944 | 1.0096 | 0.9933 |
| gi 83269867 | bifunctional phosphopantothenoylecysteine decarboxylase             | BAB2_1024 | 0.973  | 1.0432 | 1.0151 | 0.9462 |
| gi 82700238 | DNA repair protein RecN                                             | BAB1_1440 | 0.8977 | 0.9597 | 1.0587 | 0.9896 |
| gi 82699851 | RNA-binding S4                                                      | BAB1_1019 | 1.0572 | 0.9877 | 0.9442 | 1.0095 |
| gi 83269217 | 2-keto-3-deoxy-galactonokinase                                      | BAB2_0295 | 1.0125 | 1.0567 | 1.0118 | 0.9691 |
| gi 83269215 | oxidoreductase, N-terminal:oxidoreductase, C-terminal               | BAB2_0293 | 1.1612 | 1.1621 | 1.0013 | 1.0007 |
| gi 82699328 | phosphoribosylamine--glycine ligase                                 | BAB1_0442 | 0.9619 | 0.9211 | 0.995  | 1.0382 |
| gi 82699043 | ATP-dependent helicase                                              | BAB1_0121 | 0.9306 | 0.8916 | 0.9899 | 1.0323 |
| gi 83269158 | glutathione S-transferase                                           | BAB2_0230 | 1.0781 | 1.0819 | 0.9701 | 0.966  |
| gi 82700652 | hypothetical protein BAB1_1884                                      | BAB1_1884 | 1.1315 | 0.9676 | 0.8878 | 1.0376 |
| gi 82699537 | hypothetical protein BAB1_0669                                      | BAB1_0669 | 0.883  | 0.9721 | 1.1162 | 1.0151 |
| gi 83269684 | zinc-containing alcohol dehydrogenase                               | BAB2_0821 | 0.8933 | 0.9604 | 1.0551 | 0.9805 |
| gi 82699072 | ABC transporter ATPase                                              | BAB1_0156 | 0.949  | 0.9964 | 1.0027 | 0.9543 |
| gi 82699340 | chorismate synthase                                                 | BAB1_0454 | 0.902  | 0.9845 | 1.0499 | 0.9607 |
| gi 83269459 | periplasmic binding protein                                         | BAB2_0564 | 1.0292 | 0.879  | 0.8942 | 1.0469 |
| gi 82700550 | transcription factor CarD                                           | BAB1_1777 | 0.8409 | 0.9953 | 1.1266 | 0.9513 |
| gi 82699038 | outer membrane protein, putative                                    | BAB1_0116 | 1.2915 | 1.0259 | 0.9088 | 1.1433 |
| gi 82699655 | hypothetical protein BAB1_0796                                      | BAB1_0796 | 1.0105 | 0.9902 | 1.021  | 1.0406 |
| gi 82699591 | aminoacyl-tRNA synthetase, class I                                  | BAB1_0723 | 1.0141 | 0.9983 | 0.9948 | 1.0113 |
| gi 83269185 | RecA DNA recombination protein:alanine dehydrogenase                | BAB2_0261 | 1.2146 | 1.1534 | 0.9561 | 1.0031 |
| gi 82698936 | molybdopterin biosynthesis protein MoeB                             | BAB1_0004 | 0.8803 | 1.0114 | 1.1094 | 0.9657 |
| gi 82699509 | membrane alanine aminopeptidase:neutral zinc metallopeptidase       | BAB1_0641 | 0.9316 | 0.9692 | 1.0843 | 1.0418 |
| gi 83269218 | 2-dehydro-3-deoxy-6-phosphogalactonate aldolase                     | BAB2_0296 | 1.1082 | 1.052  | 0.9743 | 1.0259 |
| gi 83269541 | nucleotidyl transferase                                             | BAB2_0657 | 0.9068 | 1.0519 | 1.1031 | 0.9499 |
| gi 83269089 | AP endonuclease                                                     | BAB2_0144 | 0.8734 | 0.9422 | 1.042  | 0.9643 |
| gi 82699973 | 2-dehydro-3-deoxyphosphooctonate aldolase                           | BAB1_1156 | 1.1176 | 0.9937 | 0.8794 | 0.9895 |
| gi 83269760 | cytochrome c heme-binding site:4Fe-4S ferredoxin                    | BAB2_0905 | 0.863  | 0.9365 | 1.1319 | 1.0424 |
| gi 82700154 | sulfate-/thiosulfate-binding protein                                | BAB1_1351 | 1.1485 | 1.0707 | 1.0072 | 1.0777 |
| gi 82700139 | 3-hydroxyisobutyrate dehydrogenase                                  | BAB1_1334 | 1.2692 | 1.1209 | 1.0104 | 1.1473 |
| gi 83269427 | oxidoreductase, N-terminal:oxidoreductase                           | BAB2_0528 | 0.9992 | 1.1082 | 1.1127 | 1.0019 |
| gi 83269196 | ABC transporter ATPase                                              | BAB2_0274 | 0.9743 | 0.9887 | 1.0292 | 1.0134 |
| gi 82699928 | acyl-CoA dehydrogenase                                              | BAB1_1109 | 1.0094 | 1.0628 | 1.0219 | 0.9699 |
| gi 82700463 | deoxyuridine 5'-triphosphate nucleotidohydrolase                    | BAB1_1687 | 0.9793 | 1.0095 | 1.0134 | 0.9823 |
| gi 82700653 | hypothetical protein BAB1_1885                                      | BAB1_1885 | 1.073  | 0.9666 | 0.9147 | 1.0157 |
| gi 82700102 | homoserine dehydrogenase                                            | BAB1_1293 | 1.1447 | 1.051  | 0.918  | 0.9996 |
| gi 82700253 | UDP-N-acetylmuramoylalanyl-D--glutamate--2,6-diaminopimelate ligase | BAB1_1455 | 1.1615 | 0.9878 | 0.8569 | 1.0076 |
| gi 83269854 | glucokinase                                                         | BAB2_1010 | 0.9152 | 0.9209 | 1.0087 | 1.003  |
| gi 83269131 | bifunctional riboflavin kinase/FMN adenylyltransferase              | BAB2_0193 | 1.0087 | 1.0652 | 1.0128 | 0.9589 |
| gi 82700792 | cobalamin synthesis protein P47K                                    | BAB1_2036 | 0.8937 | 0.962  | 1.026  | 0.9527 |
| gi 82700647 | nitrilase/cyanide hydratase/apolipoprotein N-acyltransferase        | BAB1_1878 | 0.724  | 0.9367 | 1.5449 | 1.1781 |

SUPPLEMENTARY MATERIAL

|             |                                                                |           |        |        |        |        |
|-------------|----------------------------------------------------------------|-----------|--------|--------|--------|--------|
| gi 82700503 | uridine kinase                                                 | BAB1_1727 | 0.9366 | 0.9578 | 1.0265 | 1.0028 |
| gi 82699306 | hypothetical protein BAB1_0420                                 | BAB1_0420 |        |        |        |        |
| gi 82699348 | 1-deoxy-D-xylulose-5-phosphate synthase                        | BAB1_0462 | 0.8581 | 0.9992 | 1.061  | 0.9107 |
| gi 82699540 | amino acid-binding ACT domain-containing protein               | BAB1_0672 | 0.8988 | 0.8979 | 1.0632 | 1.0636 |
| gi 82700190 | hypothetical protein BAB1_1392                                 | BAB1_1392 | 0.9734 | 0.9354 | 0.9958 | 1.0364 |
| gi 82699905 | GCN5-related N-acetyltransferase                               | BAB1_1076 | 1.0084 | 0.9028 | 0.9934 | 1.109  |
| gi 82699709 | glutaredoxin:glutaredoxin-related protein                      | BAB1_0855 | 1.0883 | 1.0784 | 0.9632 | 0.9717 |
| gi 82699279 | cytochrome c heme-binding site:cytochrome C oxidase            | BAB1_0391 | 1.1689 | 1      | 0.9819 | 1.1474 |
| gi 82700400 | hypothetical protein BAB1_1612                                 | BAB1_1612 | 1.1908 | 0.9952 | 0.8449 | 1.0102 |
| gi 82699899 | TrpR binding protein WrbA                                      | BAB1_1070 | 1.1007 | 0.97   | 0.9444 | 1.071  |
| gi 82699459 | hypothetical protein BAB1_0587                                 | BAB1_0587 | 1.2342 | 1.0772 | 0.9231 | 1.057  |
| gi 82700918 | enoyl-(acyl carrier protein) reductase                         | BAB1_2172 | 1.0261 | 1.0568 | 0.9779 | 0.949  |
| gi 82700743 | diaminopimelate decarboxylase                                  | BAB1_1984 | 0.9312 | 1.05   | 1.0748 | 0.9519 |
| gi 83269133 | hypothetical protein BAB2_0195                                 | BAB2_0195 | 0.8565 | 0.8981 | 1.0736 | 1.0232 |
| gi 82698933 | chromosomal replication initiation protein                     | BAB1_0001 | 1.181  | 0.9593 | 1.0152 | 1.2531 |
| gi 82700189 | hypothetical protein BAB1_1391                                 | BAB1_1391 | 0.9242 | 0.9531 | 1.0464 | 1.0132 |
| gi 83269539 | hypothetical protein BAB2_0655                                 | BAB2_0655 | 0.859  | 1.0887 | 1.2292 | 0.9689 |
| gi 82700912 | ribosome-binding factor A                                      | BAB1_2166 | 0.933  | 0.9188 | 0.9947 | 1.0069 |
| gi 83269461 | aldehyde dehydrogenase                                         | BAB2_0566 | 1.2896 | 1.186  | 0.9376 | 1.0195 |
| gi 82700617 | hypothetical protein BAB1_1847                                 | BAB1_1847 | 0.9401 | 1.0288 | 1.0728 | 0.9794 |
| gi 82700068 | 30S ribosomal protein S10                                      | BAB1_1256 | 1.1617 | 1.0513 | 1.0024 | 1.106  |
| gi 82699797 | esterase/lipase/thioesterase, active site                      | BAB1_0946 | 1.11   | 1.0481 | 1.0079 | 1.0659 |
| gi 82699513 | aromatic-ring hydroxylase                                      | BAB1_0645 | 0.9592 | 0.9779 | 0.9507 | 0.9319 |
| gi 82699358 | amidophosphoribosyltransferase                                 | BAB1_0472 | 0.9403 | 1.0045 | 1.0867 | 1.0166 |
| gi 82699185 | histidinol dehydrogenase                                       | BAB1_0285 | 1.0242 | 0.9885 | 0.9513 | 0.9852 |
| gi 83269562 | iron-responsive transcriptional regulator                      | BAB2_0678 | 1.1098 | 1.0565 | 0.9491 | 0.9961 |
| gi 83269124 | fumarate hydratase                                             | BAB2_0186 | 1.0237 | 0.973  | 0.9849 | 1.0357 |
| gi 82700867 | esterase/lipase/thioesterase, active site:Alpha/beta hydrolase | BAB1_2120 | 0.9959 | 1.0218 | 1.0886 | 1.0609 |
| gi 82700395 | tRNA (5-methylaminomethyl-2-thiouridylate)-methyltransferase   | BAB1_1607 | 1.0687 | 1.0238 | 1.0564 | 1.1041 |
| gi 82699496 | response regulator receiver                                    | BAB1_0628 | 0.9835 | 0.995  | 1.0699 | 1.0569 |
| gi 82699088 | ribonuclease PH                                                | BAB1_0172 | 0.9825 | 1.0942 | 1.0396 | 0.9333 |
| gi 83269833 | acetylglutamate kinase                                         | BAB2_0988 | 0.9826 | 0.9758 | 0.9794 | 0.9864 |
| gi 83269548 | solute-binding family 5 protein                                | BAB2_0664 | 1.0742 | 1.0232 | 0.9135 | 0.9582 |
| gi 83269359 | pyrroline-5-carboxylate reductase                              | BAB2_0456 | 0.9973 | 0.9289 | 0.9559 | 1.025  |
| gi 83269269 | isopropylmalate isomerase small subunit                        | BAB2_0353 | 0.9724 | 0.9731 | 1.013  | 1.0111 |
| gi 82700861 | tryptophan synthase subunit alpha                              | BAB1_2110 | 1.1207 | 1.092  | 1.0674 | 1.0941 |
| gi 82700526 | glucose/ribitol dehydrogenase                                  | BAB1_1750 | 0.9656 | 0.9616 | 0.973  | 0.9764 |
| gi 82700495 | thiamine-phosphate pyrophosphorylase                           | BAB1_1719 | 1.171  | 1.0099 | 0.8725 | 1.0109 |
| gi 82700427 | ABC transporter ATPase                                         | BAB1_1650 | 0.9362 | 0.9709 | 1.0409 | 1.0029 |
| gi 82699976 | ErfK/YbiS/YcfS/YnhG                                            | BAB1_1159 | 0.9162 | 1.1829 | 1.1403 | 0.8831 |
| gi 82699760 | hypothetical protein BAB1_0909                                 | BAB1_0909 | 1.0654 | 0.9634 | 0.887  | 0.9799 |
| gi 82699623 | cystathionine beta-lyase                                       | BAB1_0760 | 1.0891 | 1.1301 | 0.9912 | 0.9546 |
| gi 83269597 | transketolase, central region:transketolase, C terminal        | BAB2_0714 | 1.0607 | 0.9837 | 0.9136 | 0.9845 |

SUPPLEMENTARY MATERIAL

|             |                                                                |           |        |        |        |        |
|-------------|----------------------------------------------------------------|-----------|--------|--------|--------|--------|
| gi 83269351 | hypothetical protein BAB2_0448                                 | BAB2_0448 | 0.9784 | 0.9942 | 0.9827 | 0.9666 |
| gi 82700836 | imidazoleglycerol-phosphate dehydratase                        | BAB1_2082 | 0.9311 | 0.9059 | 0.999  | 1.0262 |
| gi 82700578 | F0F1 ATP synthase subunit epsilon                              | BAB1_1806 | 0.9871 | 0.9987 | 0.947  | 0.9354 |
| gi 82700501 | hypothetical protein BAB1_1725                                 | BAB1_1725 | 0.9588 | 0.968  | 1.0726 | 1.0619 |
| gi 82700453 | hypothetical protein BAB1_1676                                 | BAB1_1676 | 1.0807 | 0.8915 | 0.8421 | 1.0206 |
| gi 82700128 | hypothetical protein BAB1_1322                                 | BAB1_1322 | 0.9826 | 1.0137 | 1.0521 | 1.0194 |
| gi 82699695 | glyoxalase/bleomycin resistance protein/dioxygenase            | BAB1_0838 | 1.0391 | 0.9665 | 0.9928 | 1.0664 |
| gi 82699525 | histidinol-phosphate aminotransferase                          | BAB1_0657 | 0.8086 | 0.9022 | 1.1288 | 1.011  |
| gi 82699471 | hypothetical protein BAB1_0599                                 | BAB1_0599 | 0.946  | 0.9712 | 1.0441 | 1.016  |
| gi 82699458 | Mg2+ transporter protein, CorA-like                            | BAB1_0583 | 1.15   | 0.9719 | 0.9611 | 1.1367 |
| gi 82699229 | O-succinylhomoserine sulfhydrylase                             | BAB1_0335 | 1.023  | 0.9234 | 0.9473 | 1.0502 |
| gi 82699186 | hypothetical protein BAB1_0286                                 | BAB1_0286 | 1.072  | 1.0132 | 0.9454 | 0.9995 |
| gi 82699635 | hypothetical protein BAB1_0776                                 | BAB1_0776 | 0.9747 | 1.0259 | 1.0599 | 1.0062 |
| gi 82700741 | argininosuccinate lyase                                        | BAB1_1982 | 1.0272 | 0.9858 | 1.0369 | 1.0804 |
| gi 82700496 | Sel1 repeat-containing protein                                 | BAB1_1720 | 1.0915 | 1.0893 | 0.9862 | 0.9866 |
| gi 82700351 | Rieske iron-sulphur domain-containing protein                  | BAB1_1559 | 1.0392 | 1.0687 | 1.0184 | 0.9897 |
| gi 82699326 | acyl-CoA dehydrogenase                                         | BAB1_0440 | 1.0228 | 0.9672 | 0.9554 | 1.0096 |
| gi 83269242 | sugar isomerase (SIS)                                          | BAB2_0323 | 0.9293 | 0.9547 | 1.0564 | 1.0268 |
| gi 82699691 | NADH dehydrogenase subunit M                                   | BAB1_0834 | 0.9548 | 0.9929 | 1.0573 | 1.0164 |
| gi 83269401 | glycine betaine ABC transporter ATP-binding protein            | BAB2_0502 | 1.2761 | 1.082  | 0.9254 | 1.0915 |
| gi 82700779 | chaperonin ClpA/B                                              | BAB1_2023 | 0.9397 | 0.9708 | 1.0026 | 0.9698 |
| gi 82700338 | hypothetical protein BAB1_1546                                 | BAB1_1546 | 0.9851 | 1.016  | 1.0443 | 1.0119 |
| gi 83269204 | Leu/Ile/Val-binding family protein                             | BAB2_0282 | 1.3554 | 1.1354 | 0.8395 | 1.0029 |
| gi 82699748 | antifreeze protein, type I                                     | BAB1_0897 | 1.0931 | 1.0623 | 0.9842 | 1.0124 |
| gi 82698942 | solute-binding family 5 protein                                | BAB1_0010 | 1.0499 | 0.922  | 0.8698 | 0.9897 |
| gi 83269140 | modulator of DNA gyrase                                        | BAB2_0205 | 0.9663 | 0.9331 | 0.9918 | 1.0249 |
| gi 82700765 | response regulator receiver:transcriptional regulatory protein | BAB1_2006 | 1.0234 | 0.9675 | 0.9899 | 1.0466 |
| gi 82700914 | 30S ribosomal protein S15                                      | BAB1_2168 | 1.0883 | 1.0196 | 0.9453 | 1.0076 |
| gi 82700057 | 50S ribosomal protein L14                                      | BAB1_1245 | 0.9892 | 1.1021 | 1.0728 | 0.9622 |
| gi 82699504 | response regulator receiver:transcriptional regulatory protein | BAB1_0636 | 1.0782 | 0.8681 | 0.8442 | 1.0473 |
| gi 83269172 | cobalamin synthesis protein P47K                               | BAB2_0246 | 1.1269 | 1.0716 | 0.9892 | 1.0394 |
| gi 82700424 | short chain dehydrogenase                                      | BAB1_1647 | 1.1563 | 1.0039 | 0.8795 | 1.0127 |
| gi 82698959 | hypothetical protein BAB1_0030                                 | BAB1_0030 | 1.2086 | 1.2097 | 0.9408 | 0.9473 |
| gi 82699321 | FAD linked oxidase                                             | BAB1_0435 | 1.2158 | 1.1952 | 1.0063 | 1.0233 |
| gi 82700781 | heat shock protein DnaJ                                        | BAB1_2025 | 0.9885 | 1.0778 | 1.0294 | 0.9446 |
| gi 82700054 | 30S ribosomal protein S14                                      | BAB1_1242 | 1.0287 | 1.0822 | 0.9663 | 0.9167 |
| gi 82699607 | ETC complex I subunit region                                   | BAB1_0739 | 1.1495 | 1.0766 | 0.9837 | 1.0497 |
| gi 82699710 | hypothetical protein BAB1_0856                                 | BAB1_0856 | 1.0854 | 0.9065 | 0.8622 | 1.0333 |
| gi 82700047 | preprotein translocase subunit SecY                            | BAB1_1235 | 0.9188 | 0.9367 | 0.9733 | 0.9542 |
| gi 83269171 | ATP/GTP-binding motif-containing protein                       | BAB2_0245 | 1.075  | 1.1395 | 1.033  | 0.9739 |
| gi 83269023 | peptidoglycan binding domain-containing protein                | BAB2_0069 | 0.9368 | 1.1418 | 1.1434 | 0.9372 |
| gi 82699388 | PAS domain-containing protein                                  | BAB1_0507 | 1.122  | 1.0229 | 1.037  | 1.1353 |
| gi 83269136 | high mobility group proteins HMG-I and HMG-Y                   | BAB2_0198 | 0.9549 | 0.9784 | 0.9661 | 0.9423 |

## SUPPLEMENTARY MATERIAL

|             |                                                                   |           |        |         |        |        |
|-------------|-------------------------------------------------------------------|-----------|--------|---------|--------|--------|
| gi 82700296 | carbamoyl phosphate synthase small subunit                        | BAB1_1502 | 1.0333 | 1.0394  | 0.9586 | 0.9523 |
| gi 82700551 | 7Fe ferredoxin                                                    | BAB1_1778 | 1.0973 | 0.9771  | 0.8798 | 0.9873 |
| gi 82700919 | 3-oxoacyl-(acyl carrier protein) synthase I                       | BAB1_2173 | 1.1151 | 1.1684  | 1.0174 | 0.9703 |
| gi 83269120 | ATP phosphoribosyltransferase regulatory subunit                  | BAB2_0182 | 0.9179 | 0.9305  | 1.0811 | 1.0661 |
| gi 82699981 | indole-3-glycerol-phosphate synthase                              | BAB1_1164 | 0.9166 | 1.0923  | 1.1134 | 0.9325 |
| gi 82699377 | hypothetical protein BAB1_0491                                    | BAB1_0491 | 0.7966 | 0.9568  | 1.1416 | 0.949  |
| gi 82700335 | hypothetical protein BAB1_1543                                    | BAB1_1543 | 0.9378 | 0.9695  | 0.9881 | 0.9549 |
| gi 82700059 | 50S ribosomal protein L29                                         | BAB1_1247 | 1.1851 | 1.0908  | 0.9939 | 1.0794 |
| gi 82699330 | pyridoxamine 5'-phosphate oxidase                                 | BAB1_0444 | 1.1092 | 0.9908  | 0.9813 | 1.097  |
| gi 82700304 | cold shock DNA-binding domain-containing protein                  | BAB1_1512 | 1.0989 | 0.9399  | 0.8984 | 1.0495 |
| gi 82700811 | ABC transporter ATPase                                            | BAB1_2057 | 0.9764 | 1.0711  | 1.0478 | 0.9556 |
| gi 82700926 | NLP/P60                                                           | BAB1_2180 | 0.9616 | 0.9945  | 1.0935 | 1.0563 |
| gi 82700237 | NAD-dependent DNA ligase LigA                                     | BAB1_1439 | 0.9334 | 1.0185  | 1.1541 | 1.0576 |
| gi 83269547 | DSBA oxidoreductase                                               | BAB2_0663 | 0.9098 | 1.1109  | 1.0751 | 0.8794 |
| gi 82699953 | RNA-binding protein Hfq                                           | BAB1_1134 | 0.937  | 0.9267  | 0.9046 | 0.9144 |
| gi 83269119 | histidyl-tRNA synthetase                                          | BAB2_0181 | 0.9156 | 0.9357  | 1.0117 | 0.9892 |
| gi 82699701 | ABC transporter ATPase                                            | BAB1_0844 | 1.0229 | 0.9418  | 0.9528 | 1.034  |
| gi 82699629 | salicylate hydroxylase                                            | BAB1_0770 | 0.9513 | 0.9928  | 1.0416 | 0.998  |
| gi 82700627 | 50S ribosomal protein L27                                         | BAB1_1857 | 0.9616 | 1.1652  | 1.186  | 0.9781 |
| gi 82699910 | NAD binding site:NAD-dependent epimerase/dehydratase              | BAB1_1088 | 0.9962 | 1.0405  | 1.136  | 1.0851 |
| gi 82700440 | malate synthase G                                                 | BAB1_1663 | 0.5954 | 0.8977  | 1.5749 | 1.0432 |
| gi 82700762 | hypothetical protein BAB1_2003                                    | BAB1_2003 | 0.9947 | 0.9873  | 0.9638 | 0.9714 |
| gi 82699964 | lipoyl synthase                                                   | BAB1_1147 | 1.0533 | 1.104   | 1.0473 | 0.9959 |
| gi 83269506 | hypothetical protein BAB2_0620                                    | BAB2_0620 | 1.29   | 1.2386  | 1.0005 | 1.039  |
| gi 82700839 | 1-(5-phosphoribosyl)-5-[(5-phosphoribosylamino)methylideneamino]  | BAB1_2085 | 1.0132 | 0.9668  | 0.948  | 0.9922 |
| gi 82699205 | allantoate amidohydrolase                                         | BAB1_0310 | 9.6518 | 11.4809 | 1.3422 | 1.0955 |
| gi 82699256 | carboxynorspermidine decarboxylase                                | BAB1_0363 | 1.0821 | 1.0095  | 0.9159 | 0.9811 |
| gi 82699991 | (3R)-hydroxymyristoyl-ACP dehydratase                             | BAB1_1174 | 0.9864 | 0.9693  | 0.9613 | 0.9771 |
| gi 82700101 | fructose 1,6-bisphosphatase II                                    | BAB1_1292 | 1.0173 | 1.0328  | 1.0118 | 0.9959 |
| gi 82700442 | RNA polymerase factor sigma-32                                    | BAB1_1665 | 1.0224 | 0.9772  | 1.0504 | 1.1003 |
| gi 82699451 | betaine aldehyde dehydrogenase                                    | BAB1_0576 | 1.2133 | 1.2411  | 1.0171 | 0.993  |
| gi 82699657 | 3-oxoacyl-(acyl carrier protein) synthase III                     | BAB1_0798 | 1.1314 | 1.0151  | 0.9186 | 1.0232 |
| gi 82699223 | Pollen allergen Poa pIX/Phl pVI, C-terminal                       | BAB1_0329 | 0.9163 | 1.1496  | 1.1838 | 0.943  |
| gi 82699042 | DNA polymerase I                                                  | BAB1_0120 | 1.0074 | 0.944   | 0.956  | 1.0198 |
| gi 83269223 | urocanate hydratase                                               | BAB2_0303 | 1.2057 | 1.2162  | 0.9625 | 0.9538 |
| gi 82699068 | integration host factor subunit beta                              | BAB1_0152 | 0.9512 | 1.0005  | 1.0258 | 0.9747 |
| gi 82700360 | polynucleotide adenyltransferase                                  | BAB1_1570 | 1.0115 | 1.0263  | 1.0527 | 1.0367 |
| gi 83269585 | binding-protein dependent transport system inner membrane protein | BAB2_0702 | 1.3316 | 1.272   | 0.9988 | 1.0448 |
| gi 82700728 | glucose/ribitol dehydrogenase                                     | BAB1_1968 | 1.0294 | 0.9942  | 0.9987 | 1.0325 |
| gi 82700421 | OmpA-like transmembrane domain-containing protein                 | BAB1_1639 | 1.1024 | 0.6811  | 0.854  | 1.3808 |
| gi 82700049 | 50S ribosomal protein L30                                         | BAB1_1237 | 1.1761 | 1.1842  | 0.9776 | 0.9711 |
| gi 82699656 | putative glycerol-3-phosphate acyltransferase PlsX                | BAB1_0797 | 0.9226 | 1.052   | 1.134  | 0.9941 |
| gi 82699142 | solute-binding family 1 protein                                   | BAB1_0238 | 0.8921 | 0.8505  | 0.9347 | 0.9791 |

## SUPPLEMENTARY MATERIAL

|              |                                                                   |           |        |        |        |        |
|--------------|-------------------------------------------------------------------|-----------|--------|--------|--------|--------|
| gi 82700745  | phosphoribosyltransferase:hypoxanthine phosphoribosyl transferase | BAB1_1986 | 0.8278 | 1.0247 | 1.1526 | 0.9305 |
| gi 82700159  | RbsD or FucU transport                                            | BAB1_1356 | 1.0934 | 0.9704 | 0.912  | 1.0272 |
| gi 82699365  | 30S ribosomal protein S18                                         | BAB1_0479 | 1.1044 | 1.0143 | 0.9374 | 1.02   |
| gi 82699460  | ATP/GTP-binding motif-containing protein                          | BAB1_0588 | 0.9474 | 1.0421 | 1.0791 | 0.9821 |
| gi 82700756  | ABC transporter ATPase                                            | BAB1_1997 | 0.95   | 0.9637 | 1.0493 | 1.0359 |
| gi 82699291  | GTP-binding protein EngA                                          | BAB1_0405 | 0.8933 | 0.9477 | 1.0491 | 0.9883 |
| gi 83269374  | glutamine synthetase catalytic domain                             | BAB2_0471 | 1.0022 | 1.0178 | 1.0182 | 1.0024 |
| gi 82700900  | hypothetical protein BAB1_2154                                    | BAB1_2154 | 0.9581 | 0.9913 | 1.0525 | 1.0166 |
| gi 82700610  | aldehyde dehydrogenase                                            | BAB1_1840 | 0.9038 | 1.1169 | 1.1531 | 0.933  |
| gi 83269203  | ABC transporter ATPase                                            | BAB2_0281 | 0.9983 | 0.9552 | 1.0287 | 1.0743 |
| gi 83269086  | putative aldolase                                                 | BAB2_0141 | 0.746  | 0.8298 | 1.0356 | 0.9354 |
| gi 83269404  | immunoreactive 14 kDa protein BA14k                               | BAB2_0505 | 1.1089 | 1.0838 | 0.9475 | 0.9688 |
| gi 82698971  | surface antigen (D15)                                             | BAB1_0038 | 0.928  | 0.8978 | 0.9638 | 0.9956 |
| gi 82698967  | copper center Cu(A):cytochrome o ubiquinol oxidase subunit II     | BAB1_0038 | 0.8622 | 1.1883 | 1.2189 | 0.8837 |
| gi 162002873 | uridylyate kinase                                                 | BAB1_1182 | 1.2138 | 1.2683 | 1.0237 | 0.979  |
| gi 83269454  | hydantoinase/oxoprolinase:hydantoinase B/oxoprolinase             | BAB2_0559 | 1.0212 | 1.0318 | 1.0107 | 0.9988 |
| gi 82700221  | hypothetical protein BAB1_1423                                    | BAB1_1423 | 0.9513 | 0.9929 | 0.9321 | 0.8905 |
| gi 82699102  | B12-dependent methionine synthase                                 | BAB1_0188 | 0.9875 | 1.0113 | 1.0256 | 1.0004 |
| gi 82700593  | heat shock protein HtpX                                           | BAB1_1821 | 1.0753 | 1.1641 | 1.032  | 0.9526 |
| gi 82700038  | outer membrane protein MotY                                       | BAB1_1226 | 1.1956 | 1.0361 | 0.9052 | 1.0427 |
| gi 83269138  | patatin                                                           | BAB2_0203 | 0.9965 | 0.8659 | 0.8696 | 1.0012 |
| gi 82700913  | tRNA pseudouridine synthase B                                     | BAB1_2167 | 1.0174 | 0.9876 | 1.0451 | 1.0753 |
| gi 82700634  | hypothetical protein BAB1_1864                                    | BAB1_1864 | 0.8858 | 0.9325 | 1.0193 | 0.9656 |
| gi 82699688  | NADH dehydrogenase subunit J                                      | BAB1_0831 | 0.9942 | 1.0221 | 0.9568 | 0.9303 |
| gi 82700225  | Alpha-isopropylmalate/homocitrate synthase:AsmA                   | BAB1_1427 | 0.8935 | 0.959  | 1.0779 | 1.0033 |
| gi 83269008  | glutamate synthase subunit beta                                   | BAB2_0054 | 0.951  | 0.8866 | 0.9848 | 1.0557 |
| gi 83269885  | branched-chain alpha-keto acid dehydrogenase subunit E2           | BAB2_1042 | 0.9757 | 0.9512 | 0.9385 | 0.9622 |
| gi 83269865  | phospholipase D/transphosphatidylase                              | BAB2_1021 | 0.8759 | 0.9899 | 1.0657 | 0.942  |
| gi 82699195  | urease subunit gamma                                              | BAB1_0298 | 1.1193 | 1.1045 | 1.0014 | 1.0136 |
| gi 82699212  | thiol (cysteine) protease                                         | BAB1_0318 | 1.0105 | 0.987  | 0.9945 | 1.0169 |
| gi 82700499  | inositol phosphatase/fructose-1,6-bisphosphatase                  | BAB1_1723 | 1.0262 | 0.9933 | 0.9216 | 0.9522 |
| gi 82700025  | hypothetical protein BAB1_1213                                    | BAB1_1213 | 0.9524 | 0.9481 | 0.9586 | 0.9623 |
| gi 82700405  | oxidoreductase, N-terminal:oxidoreductase, C-terminal             | BAB1_1617 | 1.0972 | 1.0591 | 0.9893 | 1.0242 |
| gi 82699029  | ABC transporter ATPase                                            | BAB1_0107 | 1.0577 | 0.9477 | 0.9892 | 1.1034 |
| gi 82699872  | hypothetical protein BAB1_1040                                    | BAB1_1040 | 1.0644 | 0.9371 | 0.8476 | 0.9622 |
| gi 82699024  | formate/nitrite transporter                                       | BAB1_0102 | 0.8896 | 0.8766 | 0.976  | 0.99   |
| gi 83269849  | glutathione S-transferase                                         | BAB2_1005 | 1.2516 | 0.8368 | 0.7148 | 1.0684 |
| gi 83269450  | Ppx/GppA phosphatase                                              | BAB2_0555 | 0.9486 | 0.8925 | 1.0463 | 1.1102 |
| gi 83269190  | MaoC-like dehydratase                                             | BAB2_0266 | 1.0038 | 0.9787 | 1.02   | 1.0458 |
| gi 83269176  | transcriptional regulator LacI                                    | BAB2_0250 | 1.0186 | 1.0074 | 0.9764 | 0.9868 |
| gi 82700486  | hypothetical protein BAB1_1710                                    | BAB1_1710 | 1.1011 | 0.9045 | 0.8424 | 1.0247 |
| gi 82700117  | hypothetical protein BAB1_1308                                    | BAB1_1308 | 1.0029 | 1.0451 | 1.0682 | 1.0244 |
| gi 82699084  | ribokinase:carbohydrate kinase, PfkB                              | BAB1_0168 | 1.2075 | 1.0252 | 0.882  | 1.0376 |

SUPPLEMENTARY MATERIAL

|             |                                                   |           |        |        |        |        |
|-------------|---------------------------------------------------|-----------|--------|--------|--------|--------|
| gi 82699065 | tRNA/rRNA methyltransferase (SpoU)                | BAB1_0149 | 0.9385 | 0.925  | 1.0258 | 1.0397 |
| gi 82700006 | histidine triad (HIT) protein                     | BAB1_1190 | 0.96   | 1.1235 | 0.9861 | 0.842  |
| gi 82698989 | hypothetical protein BAB1_0063                    | BAB1_0063 | 0.9915 | 1.0047 | 0.9561 | 0.9426 |
| gi 82699297 | F0F1 ATP synthase subunit A                       | BAB1_0411 | 1.0581 | 0.9937 | 0.9771 | 1.0389 |
| gi 82699386 | ribosomal protein S7                              | BAB1_0505 | 0.8512 | 1.209  | 1.2257 | 0.8629 |
| gi 82700890 | ABC transporter ATPase                            | BAB1_2144 | 1.0548 | 1.0292 | 0.962  | 0.9859 |
| gi 82700252 | cytoplasmic peptidoglycan synthetase              | BAB1_1454 | 0.8558 | 1.0133 | 1.1578 | 0.9765 |
| gi 83269308 | type I restriction-modification system, S subunit | BAB2_0396 | 1.0131 | 0.9866 | 1.0449 | 1.0723 |
| gi 82699581 | ABC transporter ATPase                            | BAB1_0713 | 0.9144 | 1.0975 | 1.1076 | 0.9221 |
| gi 82699374 | hypothetical protein BAB1_0488                    | BAB1_0488 | 0.9607 | 1.026  | 1.0802 | 1.0118 |
| gi 82699277 | cytochrome c heme-binding site:cytochrome c       | BAB1_0389 | 0.984  | 0.9613 | 0.9655 | 0.9876 |
| gi 82699062 | DNA mismatch repair protein                       | BAB1_0146 | 0.8603 | 1.0352 | 1.1158 | 0.9266 |
| gi 83269621 | hypothetical protein BAB2_0740                    | BAB2_0740 | 1.1959 | 0.97   | 0.8678 | 1.0688 |
| gi 83269026 | CBS domain-containing protein:cytochrome b5       | BAB2_0072 | 0.9714 | 0.9847 | 0.9896 | 0.9755 |
| gi 82700697 | diaminopimelate epimerase                         | BAB1_1932 | 0.9599 | 1.0122 | 0.9351 | 0.8866 |
| gi 82700419 | Short-chain dehydrogenase/reductase SDR           | BAB1_1635 | 1.1033 | 1.0255 | 0.9554 | 1.0268 |
| gi 82699819 | molybdenum cofactor biosynthesis protein A        | BAB1_0973 | 0.84   | 0.9894 | 1.222  | 1.0381 |
| gi 82699687 | NADH dehydrogenase subunit I                      | BAB1_0830 | 1.0238 | 0.9854 | 0.9977 | 1.0362 |
| gi 83269453 | glutamate-binding protein                         | BAB2_0558 | 0.8809 | 1.0253 | 1.1586 | 0.9965 |
| gi 83269261 | hypothetical protein BAB2_0345                    | BAB2_0345 | 1.2262 | 1.0645 | 0.9071 | 1.0446 |
| gi 83268961 | ribokinase:carbohydrate kinase, PfkB              | BAB2_0004 | 1.0016 | 0.9339 | 0.9467 | 1.0146 |
| gi 82700363 | chaperonin clpA/B:AAA ATPase                      | BAB1_1573 | 0.9169 | 0.9926 | 1.0443 | 0.9638 |
| gi 82699962 | CinA, C-terminal                                  | BAB1_1144 | 1.1962 | 0.9846 | 0.9167 | 1.113  |
| gi 82699934 | queuine tRNA-ribosyltransferase                   | BAB1_1115 | 0.9042 | 0.9988 | 1.0338 | 0.9335 |
| gi 82699931 | acriflavin resistance protein                     | BAB1_1112 | 0.9989 | 0.9583 | 0.9637 | 1.0039 |
| gi 82699878 | hypothetical protein BAB1_1048                    | BAB1_1048 | 0.873  | 0.8472 | 0.9002 | 0.9271 |
| gi 82699733 | HAD family hydrolase                              | BAB1_0880 | 1.0615 | 1.0137 | 0.984  | 1.0297 |
| gi 82699359 | colicin V production protein                      | BAB1_0473 | 0.9459 | 0.9914 | 1.0851 | 1.0338 |
| gi 82699351 | hypothetical protein BAB1_0465                    | BAB1_0465 | 0.9222 | 1.0243 | 1.0343 | 0.9298 |
| gi 82699252 | pantoate--beta-alanine ligase                     | BAB1_0359 | 1.0857 | 0.9531 | 0.9126 | 1.0393 |
| gi 82699197 | urease subunit alpha                              | BAB1_0300 | 1.1975 | 1.1626 | 1.0772 | 1.1082 |
| gi 83269841 | peptide deformylase                               | BAB2_0997 | 1.0398 | 1.0464 | 0.9768 | 0.9699 |
| gi 83269745 | septum formation inhibitor                        | BAB2_0884 | 0.924  | 0.9708 | 1.0483 | 0.9965 |
| gi 83269608 | Beta and gamma crystallin                         | BAB2_0727 | 1.0715 | 1.0474 | 1.0088 | 1.0314 |
| gi 83269489 | alpha/beta hydrolase                              | BAB2_0598 | 0.9845 | 0.9757 | 1.0543 | 1.0631 |
| gi 83269360 | tetrahydrofolate dehydrogenase/cyclohydrolase     | BAB2_0457 | 0.8824 | 0.9384 | 1.0543 | 0.9906 |
| gi 83269300 | hypothetical protein BAB2_0388                    | BAB2_0388 | 0.968  | 1.027  | 1.1094 | 1.045  |
| gi 83269280 | fructose-1,6-bisphosphatase                       | BAB2_0364 | 0.9902 | 1.1251 | 1.1007 | 0.9666 |
| gi 83269087 | hypothetical protein BAB2_0142                    | BAB2_0142 | 0.8593 | 0.8523 | 1.0359 | 1.0437 |
| gi 83269044 | GCN5-related N-acetyltransferase                  | BAB2_0090 | 1.2608 | 1.4395 | 1.0779 | 0.9423 |
| gi 83268998 | inositol phosphatase/fructose-1,6-bisphosphatase  | BAB2_0044 | 0.9888 | 1.097  | 1.0869 | 0.9791 |
| gi 82700881 | senescence marker protein-30 (SMP-30)             | BAB1_2134 | 0.9838 | 0.9396 | 0.966  | 1.0109 |
| gi 82700732 | ExsB protein                                      | BAB1_1973 | 1.1461 | 1.0024 | 0.9081 | 1.0392 |



SUPPLEMENTARY MATERIAL

|             |                                                               |           |        |        |        |        |
|-------------|---------------------------------------------------------------|-----------|--------|--------|--------|--------|
| gi 82700598 | hypothetical protein BAB1_1828                                | BAB1_1828 | 0.754  | 0.9802 | 1.4425 | 1.109  |
| gi 82700572 | proline racemase, putative                                    | BAB1_1800 | 1.3059 | 1.3687 | 1.0866 | 1.0378 |
| gi 82700561 | 4-hydroxy-3-methylbut-2-en-1-yl diphosphate synthase          | BAB1_1788 | 1.142  | 1.0573 | 0.9459 | 1.021  |
| gi 82700531 | 1-(5-phosphoribosyl)-5-amino-4-imidazole-carboxyl carboxylase | BAB1_1757 | 1.2118 | 0.9596 | 0.9924 | 1.2562 |
| gi 82700528 | hypothetical protein BAB1_1754                                | BAB1_1754 | 1.1702 | 1.1719 | 1.0185 | 1.0164 |
| gi 82700513 | hypothetical protein BAB1_1737                                | BAB1_1737 | 0.9923 | 0.9508 | 0.9768 | 1.0171 |
| gi 82700510 | hypothetical protein BAB1_1734                                | BAB1_1734 | 0.9588 | 1.0412 | 1.0387 | 0.9559 |
| gi 82700445 | ferric-uptake regulator                                       | BAB1_1668 | 1.0287 | 1.0033 | 0.9884 | 1.0128 |
| gi 82700355 | purine nucleoside permease                                    | BAB1_1563 | 1.0883 | 1.2611 | 1.1231 | 0.9686 |
| gi 82700348 | adenine phosphoribosyltransferase                             | BAB1_1556 | 0.9296 | 0.9655 | 1.0192 | 0.9811 |
| gi 82699980 | anthranilate phosphoribosyltransferase                        | BAB1_1163 | 1.2209 | 0.9506 | 0.889  | 1.144  |
| gi 82699938 | phosphopantetheine adenylyltransferase                        | BAB1_1119 | 0.8847 | 0.9327 | 0.9898 | 0.9383 |
| gi 82699811 | protein-L-isoaspartate(D-aspartate) O-methyltransferase       | BAB1_0962 | 1.0418 | 1.0197 | 0.9454 | 0.9654 |
| gi 82699756 | stationary phase survival protein SurE                        | BAB1_0905 | 1.0032 | 1.0391 | 0.9938 | 0.9584 |
| gi 82699640 | enoyl-CoA hydratase                                           | BAB1_0781 | 0.9594 | 1.032  | 1.1042 | 1.0244 |
| gi 82699339 | hypothetical protein BAB1_0453                                | BAB1_0453 | 1.0293 | 1.0038 | 0.9944 | 1.0184 |
| gi 82699244 | polysaccharide deacetylase                                    | BAB1_0350 | 0.9355 | 1.057  | 1.1116 | 0.9848 |
| gi 82699198 | urease accessory protein UreE                                 | BAB1_0301 | 0.9572 | 0.9443 | 0.9722 | 0.9844 |
| gi 82698963 | prephenate dehydratase                                        | BAB1_0034 | 1.036  | 0.9572 | 0.9063 | 0.9839 |
| gi 83269475 | glycerol-3-phosphate transporter ATP-binding subunit          | BAB2_0582 | 1.1974 | 1.1661 | 0.9679 | 0.9933 |
| gi 83269381 | AsnC family regulatory protein                                | BAB2_0478 | 0.9002 | 0.8794 | 0.9482 | 0.97   |
| gi 83269380 | hypothetical protein BAB2_0477                                | BAB2_0477 | 0.9763 | 0.9817 | 1.0637 | 1.0572 |
| gi 83269282 | ribose-5-phosphate isomerase B                                | BAB2_0366 | 0.9849 | 0.9264 | 0.9789 | 1.0417 |
| gi 83269267 | hypothetical protein BAB2_0351                                | BAB2_0351 | 1.0092 | 1.066  | 1.0108 | 0.9563 |
| gi 83269232 | alanine racemase                                              | BAB2_0312 | 1.1848 | 1.2872 | 1.152  | 1.055  |
| gi 83269173 | creatininase                                                  | BAB2_0247 | 0.8944 | 0.8774 | 1.0784 | 1.0993 |
| gi 82700685 | hypothetical protein BAB1_1919                                | BAB1_1919 | 1.0752 | 0.9992 | 0.9544 | 1.0262 |
| gi 82700586 | hypothetical protein BAB1_1814                                | BAB1_1814 | 0.9257 | 0.9421 | 1.0129 | 0.9946 |
| gi 82700339 | M24 family metalloproteinase                                  | BAB1_1547 | 0.9954 | 0.9254 | 0.9725 | 1.0449 |
| gi 82700316 | hypothetical protein BAB1_1524                                | BAB1_1524 | 0.8561 | 1.0809 | 1.0821 | 0.8552 |
| gi 82700200 | K <sup>+</sup> potassium transporter                          | BAB1_1402 | 0.7971 | 1.0403 | 1.1688 | 0.8947 |
| gi 82700187 | camphor resistance protein CrcB                               | BAB1_1389 | 0.8651 | 0.8902 | 1.0466 | 1.0163 |
| gi 82700141 | hypothetical protein BAB1_1336                                | BAB1_1336 | 1.0773 | 0.811  | 0.9204 | 1.2196 |
| gi 82700094 | alpha/beta fold hydrolase                                     | BAB1_1282 | 1.0022 | 0.9277 | 0.9378 | 1.0125 |
| gi 82700051 | 50S ribosomal protein L18                                     | BAB1_1239 | 1.0206 | 1.0401 | 0.9759 | 0.9568 |
| gi 82699903 | alanyl-transfer RNA synthetase                                | BAB1_1074 | 1.245  | 1.1906 | 1.0608 | 1.1094 |
| gi 82699898 | molybdenum cofactor biosynthesis protein                      | BAB1_1069 | 0.9603 | 0.9985 | 1.0248 | 0.9844 |
| gi 82699840 | arsenate reductase:arsenate reductase and related             | BAB1_1008 | 1.0292 | 1.0489 | 1.0175 | 0.9975 |
| gi 82699828 | hypothetical protein BAB1_0991                                | BAB1_0991 | 1.0072 | 0.9231 | 0.9441 | 1.0296 |
| gi 82699658 | integration host factor subunit alpha                         | BAB1_0799 | 1.0126 | 0.9941 | 0.9488 | 0.9658 |
| gi 82699650 | riboflavin synthase subunit beta                              | BAB1_0791 | 0.9806 | 0.9707 | 1.0275 | 1.0365 |
| gi 82699593 | hypothetical protein BAB1_0725                                | BAB1_0725 | 1.0499 | 1.0174 | 1.0099 | 1.0415 |
| gi 82699573 | 4-hydroxythreonine-4-phosphate dehydrogenase                  | BAB1_0705 | 1.0429 | 1.0899 | 1.0101 | 0.9658 |

SUPPLEMENTARY MATERIAL

|             |                                                               |           |        |        |        |        |
|-------------|---------------------------------------------------------------|-----------|--------|--------|--------|--------|
| gi 82699288 | transport protein                                             | BAB1_0402 | 0.8383 | 0.8474 | 0.9976 | 0.9858 |
| gi 82699236 | hypothetical protein BAB1_0342                                | BAB1_0342 | 1.076  | 1.0181 | 0.9166 | 0.9676 |
| gi 82699022 | transcriptional regulator, putative                           | BAB1_0100 | 0.9701 | 0.9387 | 0.9814 | 1.0137 |
| gi 82700806 | luciferase                                                    | BAB1_2052 | 1.0127 | 0.9858 | 0.9517 | 0.9771 |
| gi 83269551 | 2-octaprenyl-6-methoxyphenyl hydroxylase                      | BAB2_0667 | 0.9614 | 1.0663 | 1.051  | 0.947  |
| gi 82699549 | ribonuclease III                                              | BAB1_0681 | 1.0342 | 1.0144 | 0.9938 | 1.0124 |
| gi 82699278 | cytochrome c oxidase, cbb3-type, CcoQ subunit                 | BAB1_0390 | 1.0152 | 1.0035 | 1.0612 | 1.0729 |
| gi 82700565 | Leu/Ile/Val-binding family protein                            | BAB1_1792 | 1.9931 | 1.9775 | 0.9925 | 1.0007 |
| gi 82700241 | UDP-3-O-[3-hydroxymyristoyl] N-acetylglucosamine deacetylase  | BAB1_1443 | 0.9812 | 1.026  | 1.0057 | 0.9615 |
| gi 82700092 | hypothetical protein BAB1_1280                                | BAB1_1280 | 0.9733 | 0.932  | 0.9547 | 0.9966 |
| gi 83269147 | DNA mismatch repair protein                                   | BAB2_0212 | 0.8885 | 0.9771 | 1.1025 | 1.0019 |
| gi 83269763 | PpiC-type peptidyl-prolyl cis-trans isomerase                 | BAB2_0908 | 0.7512 | 0.9239 | 1.3233 | 1.0753 |
| gi 82700121 | aminotransferase, class-I:aminotransferase, class I and II    | BAB1_1315 | 0.9188 | 0.8275 | 0.9158 | 1.0161 |
| gi 82699734 | glutamate-binding protein                                     | BAB1_0881 | 2.0091 | 1.672  | 0.8576 | 1.0303 |
| gi 82698941 | solute-binding family 5 protein                               | BAB1_0009 | 1.0177 | 1.0003 | 1.0511 | 1.0686 |
| gi 82700539 | hypothetical protein BAB1_1765                                | BAB1_1765 | 0.9155 | 0.9314 | 0.9577 | 0.9407 |
| gi 83269286 | D-erythrose 4-phosphate dehydrogenase                         | BAB2_0370 | 0.8352 | 0.8215 | 0.9484 | 0.9637 |
| gi 82700603 | chorismate mutase                                             | BAB1_1833 | 0.9541 | 0.9279 | 0.9629 | 0.9888 |
| gi 82699150 | Short-chain dehydrogenase/reductase SDR                       | BAB1_0246 | 0.9672 | 0.9001 | 1.078  | 1.1576 |
| gi 82700829 | calcium-binding EF-hand                                       | BAB1_2075 | 0.9635 | 0.9512 | 0.9944 | 1.0065 |
| gi 82700018 | 7-cyano-7-deazaguanine reductase                              | BAB1_1206 | 0.9915 | 0.9028 | 0.9423 | 1.0342 |
| gi 82699854 | Beta tubulin                                                  | BAB1_1022 | 0.9067 | 1.0614 | 1.0815 | 0.9232 |
| gi 83269254 | ornithine cyclodeaminase                                      | BAB2_0338 | 1.0109 | 1.04   | 1.0103 | 0.9815 |
| gi 82700783 | basic helix-loop-helix dimerization domain-containing protein | BAB1_2027 | 1.1861 | 1.0538 | 0.8468 | 0.9525 |
| gi 82699506 | rhodopsin-like GPCR superfamily protein                       | BAB1_0638 | 1.1025 | 1.0969 | 1.0171 | 1.0216 |
| gi 83269169 | putative sulfite oxidase subunit YedY                         | BAB2_0243 | 1.1342 | 0.9712 | 0.8662 | 1.0108 |
| gi 82700264 | peptidoglycan binding domain-containing protein               | BAB1_1466 |        |        |        |        |
| gi 82700793 | D-alanyl-D-alanine carboxypeptidase                           | BAB1_2037 |        |        |        |        |
| gi 82700887 | hypothetical protein BAB1_2141                                | BAB1_2141 | 1.0562 | 0.9168 | 0.8922 | 1.0271 |
| gi 82700211 | serine protease family protein                                | BAB1_1413 | 1.1111 | 0.9667 | 0.8977 | 1.031  |
| gi 83269226 | imidazolonepropionase                                         | BAB2_0306 | 0.9759 | 0.896  | 0.9199 | 1.0013 |
| gi 82699719 | hypothetical protein BAB1_0865                                | BAB1_0865 | 1.1469 | 0.9936 | 0.9095 | 1.0491 |
| gi 82699651 | transcription antitermination protein NusB                    | BAB1_0792 | 1.0867 | 1.0948 | 0.992  | 0.9821 |
| gi 82699032 | phenazine biosynthesis PhzC/PhzF protein                      | BAB1_0110 | 1.0744 | 1.0355 | 0.9612 | 0.9967 |
| gi 83269772 | sulfonate/nitrate ABC transporter periplasmic-binding protein | BAB2_0919 | 1.0102 | 0.9484 | 0.8745 | 0.9303 |
| gi 83269832 | GTPase EngB                                                   | BAB2_0987 | 0.9132 | 1.2203 | 1.1724 | 0.8768 |
| gi 83269424 | pyruvate decarboxylase                                        | BAB2_0525 | 1.1256 | 1.3739 | 1.1618 | 0.9512 |
| gi 82700724 | tetracycline resistance protein                               | BAB1_1964 | 1.0194 | 0.9578 | 0.981  | 1.0432 |
| gi 82700156 | CBS/transport-associated domain-containing protein            | BAB1_1353 | 0.9638 | 0.8942 | 1.0113 | 1.0898 |
| gi 82699262 | LuxR family regulatory protein                                | BAB1_0370 | 1.0047 | 0.9697 | 0.9587 | 0.9925 |
| gi 82699440 | mannose-6-phosphate isomerase type II                         | BAB1_0561 | 0.903  | 1.0058 | 1.1091 | 0.9952 |
| gi 82700648 | glutaredoxin                                                  | BAB1_1879 | 1.2239 | 1.081  | 0.9066 | 1.0253 |
| gi 82699801 | hypothetical protein BAB1_0950                                | BAB1_0950 | 1.0363 | 1.1556 | 1.1058 | 0.9911 |

## SUPPLEMENTARY MATERIAL

|             |                                                                   |           |        |        |        |        |
|-------------|-------------------------------------------------------------------|-----------|--------|--------|--------|--------|
| gi 82700411 | AsmA                                                              | BAB1_1623 | 0.7785 | 0.989  | 1.1321 | 0.8905 |
| gi 82700699 | GTP-binding signal recognition particle                           | BAB1_1934 | 1.1563 | 0.9521 | 0.85   | 1.0315 |
| gi 83269137 | N-6 adenine-specific DNA methylase                                | BAB2_0199 | 0.7595 | 1.0019 | 1.0898 | 0.8256 |
| gi 83269025 | hypothetical protein BAB2_0071                                    | BAB2_0071 | 0.6227 | 0.4221 | 0.7973 | 1.1754 |
| gi 82699353 | peptidoglycan-binding LysM                                        | BAB1_0467 | 0.9902 | 0.968  | 1.0048 | 1.0267 |
| gi 82698952 | 3-phosphoshikimate 1-carboxyvinyltransferase                      | BAB1_0023 | 1.0515 | 0.9996 | 0.8806 | 0.9257 |
| gi 82700812 | DNA polymerase III subunit delta                                  | BAB1_2058 | 1.0128 | 0.9207 | 1.0627 | 1.1683 |
| gi 82699621 | hypothetical protein BAB1_0758                                    | BAB1_0758 | 0.9926 | 0.8888 | 0.9397 | 1.0487 |
| gi 83268969 | isochorismatase hydrolase family protein                          | BAB2_0013 | 1.0987 | 1.0699 | 1.0138 | 1.0404 |
| gi 83269515 | 50S ribosomal protein L33                                         | BAB2_0631 | 1.1863 | 1.1191 | 0.9653 | 1.0225 |
| gi 82700932 | 30S ribosomal protein S20                                         | BAB1_2186 | 1.0079 | 1.0132 | 0.9701 | 0.9644 |
| gi 82699723 | ribulose-phosphate 3-epimerase                                    | BAB1_0869 | 0.9502 | 1.1284 | 1.053  | 0.8863 |
| gi 82700894 | putative lipoprotein                                              | BAB1_2148 | 0.9264 | 0.8617 | 1.0974 | 1.179  |
| gi 83269291 | phosphoribulokinase ABC transporter ATPase                        | BAB2_0375 | 0.602  | 0.8169 | 1.497  | 1.1024 |
| gi 82699802 | aminotransferase, class V                                         | BAB1_0951 | 1.0242 | 1.02   | 1.0299 | 1.0335 |
| gi 82700540 | H <sup>+</sup> -transporting two-sector ATPase subunit A          | BAB1_1766 | 0.8509 | 0.9567 | 1.0234 | 0.9096 |
| gi 82699743 | AP endonuclease                                                   | BAB1_0892 | 0.8855 | 1.0194 | 1.1024 | 0.957  |
| gi 82700248 | N-acetylglucosaminyl transferase                                  | BAB1_1450 | 1.0846 | 0.9695 | 0.8866 | 0.9912 |
| gi 83269554 | ABC transporter ATPase                                            | BAB2_0670 | 1.8861 | 2.2351 | 1.3583 | 1.1454 |
| gi 82699857 | hypothetical protein BAB1_1025                                    | BAB1_1025 | 1.1316 | 0.5784 | 0.9812 | 1.9183 |
| gi 82700830 | MltA family protein                                               | BAB1_2076 | 0.9627 | 0.9676 | 1.1243 | 1.1179 |
| gi 82700569 | ABC transporter ATPase                                            | BAB1_1796 | 2.3866 | 2.3579 | 1.0746 | 1.087  |
| gi 82700621 | gamma-glutamyl phosphate reductase                                | BAB1_1851 |        |        |        |        |
| gi 82699805 | inorganic polyphosphate/ATP-NAD kinase                            | BAB1_0954 |        |        |        |        |
| gi 82699285 | related:arsenate reductase and related                            | BAB1_0399 | 1.1201 | 0.9919 | 0.8889 | 1.0032 |
| gi 82700415 | isocitrate lyase and phosphorylmutase:isocitrate lyase            | BAB1_1631 | 1.2402 | 1.0571 | 0.9579 | 1.123  |
| gi 82698980 | TonB-dependent receptor protein                                   | BAB1_0054 | 0.9581 | 0.9862 | 0.9966 | 0.9676 |
| gi 83269649 | cupin domain-containing protein                                   | BAB2_0770 | 0.8911 | 1.0351 | 1.2456 | 1.0716 |
| gi 83268983 | ABC transporter:AAA ATPase                                        | BAB2_0027 | 1.0821 | 1.1228 | 0.9749 | 0.9389 |
| gi 82700293 | DNA primase                                                       | BAB1_1499 | 0.9226 | 0.9928 | 1.1524 | 1.0703 |
| gi 82699959 | ATPase-like ATP-binding protein                                   | BAB1_1141 | 0.95   | 0.9515 | 0.9903 | 0.988  |
| gi 82700295 | hypothetical protein BAB1_1501                                    | BAB1_1501 | 1.105  | 1.2284 | 1.1139 | 1.0014 |
| gi 82700322 | excinuclease ABC subunit B                                        | BAB1_1530 | 0.8325 | 0.992  | 1.1726 | 0.9834 |
| gi 83269195 | binding-protein dependent transport system inner membrane protein | BAB2_0273 | 0.9405 | 0.8315 | 0.9967 | 1.1265 |
| gi 82699813 | hypothetical protein BAB1_0964                                    | BAB1_0964 | 1.0297 | 0.9691 | 1.099  | 1.167  |
| gi 83269888 | enoyl-CoA hydratase                                               | BAB2_1046 | 2.0148 | 2.4192 | 1.1415 | 0.95   |
| gi 82699885 | hypothetical protein BAB1_1055                                    | BAB1_1055 | 0.9455 | 1.1301 | 1.1286 | 0.9437 |
| RRRRRgi 832 | REVERSED quinone oxidoreductase/zeta-crystallin                   | BAB2_0669 | 0.8059 | 0.9806 | 1.2795 | 1.0508 |
| gi 82699181 | Maf-like protein                                                  | BAB1_0281 | 0.9363 | 0.9318 | 1.0168 | 1.0211 |
| gi 82700639 | hypothetical protein BAB1_1869                                    | BAB1_1869 | 1.0229 | 1.0255 | 0.9936 | 0.9904 |
| gi 83269187 | NAD(P) transhydrogenase, beta subunit                             | BAB2_0263 |        |        |        |        |
| gi 82699871 | ABC transporter ATPase                                            | BAB1_1039 | 0.9774 | 0.924  | 0.9747 | 1.0304 |
| gi 83269029 | ferrochelatase                                                    | BAB2_0075 | 0.964  | 1.0027 | 1.0434 | 1.0024 |

SUPPLEMENTARY MATERIAL

|              |                                                                        |           |        |        |        |        |
|--------------|------------------------------------------------------------------------|-----------|--------|--------|--------|--------|
| gi 83269863  | aldehyde dehydrogenase                                                 | BAB2_1019 | 0.9395 | 0.9872 | 1.0696 | 1.0172 |
| gi 82700784  | CBS domain-containing protein                                          | BAB1_2028 | 0.9709 | 1.0571 | 1.0001 | 0.918  |
| gi 82700656  | O-sialoglycoprotein endopeptidase                                      | BAB1_1888 | 0.9688 | 0.9137 | 0.9698 | 1.0276 |
| gi 83269852  | penicillin-insensitive murein endopeptidase                            | BAB2_1008 | 0.7877 | 0.9622 | 1.1457 | 0.9373 |
| gi 83269525  | aspartate carbamoyltransferase catalytic subunit                       | BAB2_0641 | 1.0552 | 1.0712 | 1.036  | 1.0199 |
| gi 82700433  | hypothetical protein BAB1_1656                                         | BAB1_1656 |        |        |        |        |
| gi 82700186  | ABC transporter ATPase                                                 | BAB1_1388 | 0.8327 | 0.9493 | 1.0767 | 0.9439 |
| gi 82700163  | periplasmic binding protein/LacI transcriptional regulator             | BAB1_1362 | 0.8678 | 1.0277 | 1.1481 | 0.9688 |
| gi 82700099  | phosphoesterase, RecJ-like:phosphoesterase, DHHA1                      | BAB1_1290 | 0.9483 | 0.9536 | 1.0925 | 1.0858 |
| gi 83269361  | phosphogluconate dehydratase                                           | BAB2_0458 | 0.9623 | 0.9526 | 1.0417 | 1.0516 |
| gi 83269209  | D-aminopeptidase                                                       | BAB2_0287 | 1.1786 | 1.0027 | 0.9746 | 1.1448 |
| gi 82699557  | hypothetical protein BAB1_0689                                         | BAB1_0689 | 0.9062 | 1.2689 | 1.2203 | 0.8709 |
| gi 82699843  | thymidylate kinase                                                     | BAB1_1011 | 0.9617 | 0.8908 | 0.9339 | 1.0075 |
| gi 82699648  | cytidine/deoxycytidylate deaminase zinc-binding subunit                | BAB1_0789 | 0.8825 | 0.9453 | 1.2613 | 1.1768 |
| gi 82699370  | acyl carrier protein                                                   | BAB1_0484 | 0.9143 | 0.891  | 0.9682 | 0.9928 |
| gi 83269538  | lipase                                                                 | BAB2_0654 | 0.8844 | 0.8491 | 0.9473 | 0.9862 |
| gi 83269028  | Band 7 protein:stomatin                                                | BAB2_0074 | 0.8895 | 0.8537 | 0.9954 | 1.0364 |
| gi 83269240  | acriflavin resistance protein                                          | BAB2_0321 | 0.7805 | 1.2998 | 1.5329 | 0.9198 |
| gi 83269524  | dihydroorotase                                                         | BAB2_0640 | 0.9844 | 0.9743 | 1.0155 | 1.0253 |
| gi 83269405  | Iron-containing alcohol dehydrogenase                                  | BAB2_0506 | 1.9457 | 2.3143 | 1.1705 | 0.9834 |
| gi 82699977  | preprotein translocase subunit SecG                                    | BAB1_1160 | 0.7375 | 0.862  | 1.1807 | 1.0095 |
| gi 82699601  | ATP/GTP-binding protein                                                | BAB1_0733 | 1.0648 | 0.9894 | 0.936  | 1.0066 |
| gi 83269688  | shikimate/quininate 5-dehydrogenase                                    | BAB2_0825 | 0.8816 | 0.8349 | 1.0287 | 1.0855 |
| gi 82700329  | MarR family regulatory protein                                         | BAB1_1537 | 0.7184 | 0.8378 | 1.0845 | 0.9293 |
| gi 82699804  | glycosyl transferase family protein                                    | BAB1_0953 | 1.0494 | 0.9428 | 0.9615 | 1.0696 |
| gi 82699499  | TPR repeat-containing protein                                          | BAB1_0631 | 1.1236 | 0.9668 | 0.9883 | 1.1479 |
| gi 162002874 | bifunctional 2-C-methyl-D-erythritol 4-phosphate cytidyllyltransferase | BAB1_1143 |        |        |        |        |
| gi 83269536  | PAS domain: PAS-associated C-terminal domain: PAC motif                | BAB2_0652 | 0.8462 | 1.1014 | 1.3978 | 1.0732 |
| gi 83269170  | esterase/lipase/thioesterase, active site                              | BAB2_0244 | 0.872  | 0.9263 | 1.0465 | 0.9844 |
| gi 82700256  | S-adenosyl-methyltransferase MraW                                      | BAB1_1458 | 0.9692 | 1.1217 | 1.1578 | 0.9996 |
| gi 82699354  | ABC transporter ATPase                                                 | BAB1_0468 | 0.8505 | 1.0029 | 1.2295 | 1.0419 |
| gi 82700451  | hypothetical protein BAB1_1674                                         | BAB1_1674 | 1.0271 | 0.8478 | 0.9423 | 1.1408 |
| gi 82699752  | twin arginine translocase protein A                                    | BAB1_0901 | 1.5011 | 0.9286 | 0.7825 | 1.264  |
| gi 82699081  | helix-hairpin-helix DNA-binding motif-containing protein               | BAB1_0165 | 0.7819 | 0.8892 | 1.1913 | 1.0468 |
| gi 82700558  | 50S ribosomal protein L32                                              | BAB1_1785 |        |        |        |        |
| gi 82699552  | DNA repair protein RecO                                                | BAB1_0684 | 1.0102 | 0.971  | 1.0176 | 1.0579 |
| gi 82700778  | von Willebrand factor, type A: cobalt chelatase, pCobT subunit         | BAB1_2022 | 0.9065 | 0.9541 | 1.0138 | 0.9626 |
| gi 82700193  | endonuclease/exonuclease/phosphatase family protein                    | BAB1_1395 | 0.9771 | 0.9428 | 1.0694 | 1.1077 |
| gi 83269823  | aldehyde dehydrogenase                                                 | BAB2_0976 | 1.6482 | 1.5473 | 0.9141 | 0.9731 |
| gi 82700490  | Holliday junction DNA helicase B                                       | BAB1_1714 | 0.9361 | 1.0754 | 1.0894 | 0.9476 |
| gi 82699551  | GTP-binding protein Era                                                | BAB1_0683 | 0.8368 | 1.1846 | 1.0692 | 0.7548 |
| gi 83268985  | Short-chain dehydrogenase                                              | BAB2_0029 | 0.8262 | 0.7806 | 1.0611 | 1.1224 |
| gi 82700790  | Pollen allergen Poa pIX/Phl pVI, C-terminal                            | BAB1_2034 | 0.9079 | 0.9065 | 1.0819 | 1.0828 |

SUPPLEMENTARY MATERIAL

|             |                                                            |           |        |        |        |        |
|-------------|------------------------------------------------------------|-----------|--------|--------|--------|--------|
| gi 82700560 | polyprenyl synthetase                                      | BAB1_1787 | 0.7908 | 1.1088 | 1.3168 | 0.9385 |
| gi 82699764 | tRNA (uracil-5-)-methyltransferase Gid                     | BAB1_0913 | 0.8696 | 0.9825 | 1.1189 | 0.9898 |
| gi 82699569 | alpha-isopropylmalate                                      | BAB1_0701 | 1.0325 | 1.2282 | 1.1288 | 0.9484 |
| gi 82699395 | HAD family hydrolase                                       | BAB1_0514 | 1.0463 | 0.95   | 0.9524 | 1.0483 |
| gi 82700181 | Urea transporter                                           | BAB1_1383 | 1.0674 | 0.66   | 0.8921 | 1.4419 |
| gi 82700149 | low PH-induced protein A                                   | BAB1_1346 | 1.201  | 1.0631 | 1.1212 | 1.2658 |
| gi 82700093 | WW/Rsp5/WWP domain-/bacterial transferase                  | BAB1_1281 | 0.9984 | 1.0313 | 1.0073 | 0.9745 |
| gi 82699995 | hypothetical protein BAB1_1178                             | BAB1_1178 | 0.7222 | 0.873  | 1.1692 | 0.9666 |
| gi 82699713 | glutathione S-transferase                                  | BAB1_0859 | 1.7797 | 1.8539 | 1.0118 | 0.9706 |
| gi 82699554 | hypothetical protein BAB1_0686                             | BAB1_0686 | 0.7699 | 1.2495 | 1.4057 | 0.8656 |
| gi 83269449 | cell division protein FtsJ                                 | BAB2_0554 | 1.0511 | 1.1787 | 1.2004 | 1.0697 |
| gi 83269317 | FMN/related compound-binding core                          | BAB2_0405 | 1.0773 | 0.9616 | 1.0297 | 1.1529 |
| gi 82700924 | TrkA potassium uptake protein                              | BAB1_2178 | 0.7839 | 0.9418 | 1.2105 | 1.0069 |
| gi 82700902 | hypothetical protein BAB1_2156                             | BAB1_2156 | 0.9136 | 1.018  | 1.1348 | 1.0177 |
| gi 82700870 | 50S ribosomal protein L35                                  | BAB1_2123 | 1.0178 | 0.9464 | 0.9259 | 0.9951 |
| gi 82700727 | universal stress protein                                   | BAB1_1967 | 0.8972 | 0.9103 | 0.8642 | 0.8512 |
| gi 82700116 | uroporphyrin-III C/tetrapyrrole methyltransferase          | BAB1_1307 | 0.9081 | 0.9694 | 1.0471 | 0.9802 |
| gi 82699935 | S-adenosylmethionine:tRNA ribosyltransferase-isomerase     | BAB1_1116 | 1.0361 | 0.9572 | 1.1494 | 1.2434 |
| gi 82699694 | Beta-lactamase-like                                        | BAB1_0837 | 0.9978 | 1.1252 | 1.0683 | 0.9468 |
| gi 82699375 | guanylate kinase                                           | BAB1_0489 | 1.0544 | 0.7137 | 0.9715 | 1.4344 |
| gi 82699304 | hypothetical protein BAB1_0418                             | BAB1_0418 | 1.0424 | 0.8255 | 0.9636 | 1.2161 |
| gi 82700815 | glucose-inhibited division protein B                       | BAB1_2061 | 1.0078 | 1.02   | 1.0883 | 1.0746 |
| gi 83269402 | GntR family regulatory protein                             | BAB2_0503 | 0.7814 | 1.1564 | 1.3702 | 0.9252 |
| gi 82699034 | ribokinase:carbohydrate kinase, PfkB                       | BAB1_0112 | 1.0602 | 1.055  | 1.0484 | 1.0529 |
| gi 82700133 | cobalamin synthesis protein P47K                           | BAB1_1327 | 1.1478 | 1.1494 | 0.9841 | 0.982  |
| gi 82700095 | hypothetical protein BAB1_1283                             | BAB1_1283 | 1.076  | 0.9072 | 0.8807 | 1.0439 |
| gi 82699779 | TPR repeat-containing protein                              | BAB1_0928 | 0.8885 | 1.4231 | 1.554  | 0.9696 |
| gi 82700534 | TPR repeat-containing protein                              | BAB1_1760 | 0.9469 | 1.0728 | 1.2601 | 1.1116 |
| gi 82699145 | ABC transporter ATPase                                     | BAB1_0241 | 0.9482 | 0.9354 | 0.965  | 0.9776 |
| gi 82698964 | 3-deoxy-manno-octulosonate cytidyltransferase              | BAB1_0035 | 0.9372 | 0.9783 | 1.0297 | 0.9858 |
| gi 82700785 | 3-dehydroquinate synthase                                  | BAB1_2029 | 1.092  | 0.8872 | 0.8589 | 1.0564 |
| gi 82700294 | Na+/Pi-cotransporter                                       | BAB1_1500 | 1.0406 | 0.9897 | 1.0218 | 1.0736 |
| gi 83269666 | methionine sulfoxide reductase B                           | BAB2_0792 | 1.0291 | 1.021  | 1.0124 | 1.0197 |
| gi 82699604 | Short-chain dehydrogenase/reductase SDR:glucose            | BAB1_0736 | 1.0133 | 1.0223 | 0.9516 | 0.9425 |
| gi 82700366 | hypothetical protein BAB1_1576                             | BAB1_1576 | 0.9496 | 1.1046 | 1.1446 | 0.9833 |
| gi 83269687 | glucose-methanol-choline oxidoreductase:GMC oxidoreductase | BAB2_0824 | 0.7309 | 0.8744 | 1.1224 | 0.9376 |
| gi 82700746 | Generic methyltransferase                                  | BAB1_1987 | 0.8372 | 0.9157 | 0.9627 | 0.8795 |
| gi 82700618 | SPOUT methyltransferase superfamily protein                | BAB1_1848 | 0.9802 | 0.8571 | 1.0726 | 1.2258 |
| gi 82699382 | 4-hydroxy-3-methylbut-2-enyl diphosphate reductase         | BAB1_0132 | 0.9414 | 1.1519 | 1.2102 | 0.9883 |
| gi 82699050 | ATPase-like ATP-binding protein                            | BAB1_0132 | 0.8806 | 1.0571 | 1.159  | 0.9648 |
| gi 83269229 | beta alanine--pyruvate transaminase                        | BAB2_0309 | 0.9989 | 1.314  | 1.2612 | 0.958  |
| gi 83269090 | hypothetical protein BAB2_0145                             | BAB2_0145 | 0.8915 | 0.8359 | 0.996  | 1.0615 |
| gi 83269088 | AsnC family regulatory protein                             | BAB2_0143 | 0.76   | 0.8739 | 1.0882 | 0.9456 |

SUPPLEMENTARY MATERIAL

|             |                                                                     |           |        |        |        |        |
|-------------|---------------------------------------------------------------------|-----------|--------|--------|--------|--------|
| gi 83268978 | GntR family regulatory protein                                      | BAB2_0022 | 0.8114 | 0.9832 | 1.1161 | 0.9204 |
| gi 82700893 | putative lipoprotein                                                | BAB1_2147 | 1.1678 | 0.7119 | 0.7488 | 1.2275 |
| gi 82700236 | hypothetical protein BAB1_1438                                      | BAB1_1438 | 0.907  | 0.9688 | 1.0918 | 1.0216 |
| gi 82700100 | D-alanine--D-alanine ligase                                         | BAB1_1291 | 0.88   | 0.9555 | 1.0221 | 0.9407 |
| gi 82699958 | response regulator receiver                                         | BAB1_1140 | 0.9054 | 0.8622 | 0.8977 | 0.9421 |
| gi 82699865 | NAD synthetase                                                      | BAB1_1033 | 0.9389 | 1.0227 | 1.053  | 0.966  |
| gi 82699758 | peptidoglycan-binding LysM:peptidase M23/M37                        | BAB1_0907 |        |        |        |        |
| gi 82699700 | general secretion pathway protein H                                 | BAB1_0843 | 0.991  | 0.9467 | 0.9584 | 1.0026 |
| gi 82699362 | methyltransferase                                                   | BAB1_0476 | 1.1598 | 1.0398 | 0.9692 | 1.0804 |
| gi 83269839 | tRNA pseudouridine synthase A                                       | BAB2_0995 | 0.9606 | 1.0133 | 1.0248 | 0.9708 |
| gi 83269598 | 2-oxoisovalerate dehydrogenase E1 component, alpha subunit          | BAB2_0715 | 1.1402 | 0.9656 | 0.8926 | 1.0533 |
| gi 83269474 | cytidine/deoxycytidylate deaminase, zinc-binding region             | BAB2_0579 | 1.2253 | 1.2723 | 1.0763 | 1.0359 |
| gi 83269429 | transcriptional regulator LysR                                      | BAB2_0530 | 0.9603 | 0.9232 | 0.9752 | 1.0137 |
| gi 83269396 | ABC transporter ATPase                                              | BAB2_0493 | 1.3038 | 1.817  | 1.2475 | 0.8945 |
| gi 83269193 | TPR repeat-containing protein                                       | BAB2_0271 | 0.9503 | 1.0848 | 1.062  | 0.9296 |
| gi 83269161 | TonB-dependent receptor protein                                     | BAB2_0233 | 0.9462 | 0.9727 | 1.0438 | 1.0147 |
| gi 83269037 | keto-hydroxyglutarate-aldolase/keto-deoxy-phosphogluconate aldolase | BAB2_0083 | 1.023  | 1.1686 | 1.2006 | 1.0503 |
| gi 82700848 | PTS system fructose subfamily IIA component                         | BAB1_2096 | 0.9694 | 0.9677 | 1.0125 | 1.0136 |
| gi 82700309 | transcriptional regulator LysR                                      | BAB1_1517 | 1.0811 | 1.2387 | 1.1045 | 0.9634 |
| gi 82700289 | antifreeze protein, type I                                          | BAB1_1495 | 1.1002 | 0.9614 | 0.8417 | 0.9625 |
| gi 82700263 | glycoside hydrolase family protein                                  | BAB1_1465 | 0.9657 | 0.9038 | 0.9944 | 1.0617 |
| gi 82700123 | uroporphyrin-III C/tetrapyrrole methyltransferase                   | BAB1_1317 | 0.8062 | 1.0681 | 1.0195 | 0.769  |
| gi 82700082 | preprotein translocase subunit SecE                                 | BAB1_1270 | 0.962  | 0.9396 | 0.9519 | 0.9739 |
| gi 82700039 | transcriptional regulatory protein                                  | BAB1_1227 | 0.9399 | 0.8751 | 0.9076 | 0.9741 |
| gi 82699848 | Beta-lactamase-like                                                 | BAB1_1016 | 0.9405 | 0.9469 | 1.0757 | 1.0678 |
| gi 82699761 | vacuolar H+-transporting two-sector ATPase subunit C                | BAB1_0910 | 0.8234 | 0.9969 | 1.2029 | 0.9929 |
| gi 82699707 | inositol phosphatase/fructose-1,6-bisphosphatase                    | BAB1_0853 | 0.963  | 0.9734 | 1.0462 | 1.0344 |
| gi 82699652 | membrane-bound proton-translocating pyrophosphatase                 | BAB1_0793 | 0.8337 | 0.9546 | 1.1413 | 0.9961 |
| gi 82699555 | glycine cleavage T protein (aminomethyl transferase)                | BAB1_0687 | 0.7512 | 0.9759 | 1.2074 | 0.9288 |
| gi 82699523 | antifreeze protein, type I                                          | BAB1_0655 | 1.1105 | 1.0079 | 0.9986 | 1.0996 |
| gi 82699505 | ATPase-like ATP-binding protein                                     | BAB1_0637 | 1.7178 | 0.8765 | 1.1201 | 2.1938 |
| gi 82699335 | ATP/GTP-binding motif-containing protein                            | BAB1_0449 | 0.6961 | 0.8218 | 1.0845 | 0.918  |
| gi 82699222 | ATPase-like ATP-binding protein                                     | BAB1_0328 | 0.9287 | 0.9386 | 0.9735 | 0.9626 |
| gi 82699078 | heat shock protein Hsp20                                            | BAB1_0162 |        |        |        |        |
| gi 82699063 | hypothetical protein BAB1_0147                                      | BAB1_0147 | 1.3143 | 1.0184 | 0.8077 | 1.0417 |
| gi 82698977 | hypothetical protein BAB1_0051                                      | BAB1_0051 | 1.0639 | 0.8012 | 0.9545 | 1.2666 |
| gi 83269922 | hypothetical protein BAB2_1083                                      | BAB2_1083 | 0.8507 | 1.0212 | 1.1731 | 0.9766 |
| gi 83269872 | methionine sulfoxide reductase A                                    | BAB2_1029 | 0.9885 | 1.0834 | 1.0054 | 0.9167 |
| gi 83269799 | lipase                                                              | BAB2_0947 | 1.079  | 0.9991 | 1.0896 | 1.176  |
| gi 83269785 | hypothetical protein BAB2_0932                                      | BAB2_0932 | 0.9253 | 1.0028 | 0.9194 | 0.8478 |
| gi 83269762 | nitrate reductase, gamma subunit                                    | BAB2_0907 | 1.1128 | 1.0216 | 0.9128 | 0.9936 |
| gi 83269717 | T4 family peptidase                                                 | BAB2_0854 | 1.072  | 1.1137 | 1.0165 | 0.9778 |
| gi 83269290 | hypothetical protein BAB2_0374                                      | BAB2_0374 |        |        |        |        |

SUPPLEMENTARY MATERIAL

|             |                                                            |           |        |        |        |        |
|-------------|------------------------------------------------------------|-----------|--------|--------|--------|--------|
| gi 83269243 | N-acetylglucosamine-6-phosphate deacetylase:amidohydrolase | BAB2_0324 | 0.7644 | 1.0192 | 1.2118 | 0.9081 |
| gi 83269224 | N-formylglutamate amidohydrolase                           | BAB2_0304 | 0.924  | 1.0695 | 1.0908 | 0.9418 |
| gi 83269177 | TrkA potassium uptake protein                              | BAB2_0251 | 0.8784 | 0.9737 | 1.0171 | 0.917  |
| gi 83269144 | 3-deoxy-D-manno-octulosonic-acid transferase               | BAB2_0209 | 0.9638 | 1.1242 | 1.0951 | 0.9382 |
| gi 83269049 | transcriptional regulator LysR                             | BAB2_0096 | 0.9917 | 0.9768 | 1.064  | 1.0795 |
| gi 83269043 | ABC transporter ATPase                                     | BAB2_0089 |        |        |        |        |
| gi 82700897 | glycoprotease (M22) metalloprotease                        | BAB1_2151 | 0.7784 | 0.9605 | 1.1667 | 0.9449 |
| gi 82700758 | hypothetical protein BAB1_1999                             | BAB1_1999 | 1.0262 | 0.9197 | 0.9548 | 1.0647 |
| gi 82700733 | putative 6-pyruvoyl tetrahydropterin synthase              | BAB1_1974 | 0.8138 | 0.9573 | 1.2458 | 1.0584 |
| gi 82700695 | lipoprotein Omp19                                          | BAB1_1930 | 0.9177 | 0.9305 | 0.967  | 0.9531 |
| gi 82700670 | hypothetical protein BAB1_1902                             | BAB1_1902 | 0.9848 | 0.8606 | 0.9261 | 1.059  |
| gi 82700641 | N-6 adenine-specific DNA methylase                         | BAB1_1871 | 1.0088 | 0.9735 | 0.9629 | 0.9971 |
| gi 82700546 | M48 family peptidase                                       | BAB1_1773 | 0.9876 | 1.0139 | 0.9939 | 0.9674 |
| gi 82700543 | thiamine transporter substrate binding subunit             | BAB1_1770 | 0.9678 | 1.0118 | 1.1185 | 1.0691 |
| gi 82700488 | MotA/TolQ/ExbB proton channel                              | BAB1_1712 | 1.0022 | 0.8929 | 0.8811 | 0.9883 |
| gi 82700457 | biopolymer transport protein ExbD/TolR                     | BAB1_1680 | 0.7609 | 0.7823 | 1.0058 | 0.9776 |
| gi 82700385 | ABC transporter ATPase                                     | BAB1_1595 | 1.0947 | 1.0011 | 0.9218 | 1.0074 |
| gi 82700344 | peptidyl-tRNA hydrolase                                    | BAB1_1552 |        |        |        |        |
| gi 82700267 | hypothetical protein BAB1_1469                             | BAB1_1469 | 1.0116 | 1.0008 | 1.0859 | 1.097  |
| gi 82700266 | methylenetetrahydrofolate reductase                        | BAB1_1468 | 0.7532 | 0.959  | 1.2379 | 0.9716 |
| gi 82700204 | ATP/GTP-binding motif-containing protein                   | BAB1_1406 | 0.856  | 0.9171 | 1.0765 | 1.0042 |
| gi 82700104 | hypothetical protein BAB1_1295                             | BAB1_1295 | 0.9456 | 0.806  | 1.0612 | 1.2442 |
| gi 82700003 | endoribonuclease L-PSP                                     | BAB1_1187 | 1.0402 | 0.9718 | 0.9584 | 1.0253 |
| gi 82699983 | molybdenum cofactor biosynthesis protein MoeA              | BAB1_1166 | 0.9432 | 1.0179 | 1.0343 | 0.9577 |
| gi 82699955 | potassium transporter peripheral membrane component        | BAB1_1137 | 0.935  | 1.0253 | 1.0111 | 0.9215 |
| gi 82699952 | ATP/GTP-binding motif-containing protein                   | BAB1_1133 | 0.7356 | 1.0582 | 1.1664 | 0.8102 |
| gi 82699945 | single-strand binding protein                              | BAB1_1126 | 0.9084 | 1.0155 | 0.9753 | 0.8718 |
| gi 82699911 | nucleoside triphosphate pyrophosphohydrolase               | BAB1_1089 | 1.1466 | 0.9141 | 0.8386 | 1.0512 |
| gi 82699795 | anhydro-N-acetylmuramic acid kinase                        | BAB1_0944 |        |        |        |        |
| gi 82699778 | DSBA oxidoreductase                                        | BAB1_0927 | 0.8948 | 0.9631 | 1.0665 | 0.9902 |
| gi 82699774 | leucyl/phenylalanyl-tRNA--protein transferase              | BAB1_0923 | 0.8967 | 0.853  | 0.9278 | 0.9747 |
| gi 82699759 | ATP/GTP-binding motif-containing protein                   | BAB1_0908 | 0.9097 | 0.849  | 0.9557 | 1.0233 |
| gi 82699671 | phenylacetic acid degradation-related protein              | BAB1_0812 | 1.138  | 1.1236 | 1.0022 | 1.0145 |
| gi 82699563 | hypothetical protein BAB1_0695                             | BAB1_0695 | 1.0839 | 1.3953 | 1.1602 | 0.9007 |
| gi 82699541 | orotate phosphoribosyltransferase                          | BAB1_0673 | 0.9377 | 1.064  | 1.0692 | 0.9416 |
| gi 82699517 | glutathione S-transferase                                  | BAB1_0649 | 1.4728 | 1.0426 | 0.9579 | 1.3521 |
| gi 82699447 | xylose isomerase                                           | BAB1_0570 | 1.0575 | 1.1356 | 1.0673 | 0.9933 |
| gi 82699239 | LuxR family regulatory protein                             | BAB1_0345 | 1.115  | 1.0876 | 0.9308 | 0.9536 |
| gi 82699129 | transcriptional regulator MerR                             | BAB1_0222 | 1.1124 | 1.044  | 0.9751 | 1.0383 |
| gi 82699069 | Clp protease:peptidase U7:Signal peptide peptidase         | BAB1_0153 | 0.9444 | 0.9274 | 0.9581 | 0.9749 |
| gi 82699015 | cytochrome c assembly protein                              | BAB1_0093 | 0.8443 | 0.8948 | 0.9613 | 0.9064 |
| gi 82699010 | hypothetical protein BAB1_0088                             | BAB1_0088 | 0.9424 | 1.2532 | 1.1323 | 0.8509 |
| gi 82699006 | sugar ABC transporter ATPase                               | BAB1_0082 |        |        |        |        |

SUPPLEMENTARY MATERIAL

|             |                                                            |           |        |        |        |        |
|-------------|------------------------------------------------------------|-----------|--------|--------|--------|--------|
| gi 82698961 | hit1 protein                                               | BAB1_0032 | 0.9011 | 0.9554 | 0.9893 | 0.9324 |
| gi 83269897 | solute-binding family 5 protein                            | BAB2_1055 | 1.8839 | 2.8282 | 1.3922 | 0.9268 |
| gi 83269840 | methionyl-tRNA formyltransferase                           | BAB2_0996 | 0.9958 | 1.0073 | 1.032  | 1.0196 |
| gi 83269793 | Crp family regulatory protein                              | BAB2_0941 | 0.9133 | 0.894  | 1.0082 | 1.0293 |
| gi 83269743 | cell division topological specificity factor MinE          | BAB2_0882 | 1.0671 | 1.0153 | 0.9987 | 1.049  |
| gi 83269690 | ABC transporter ATPase                                     | BAB2_0827 | 0.7278 | 0.6934 | 0.8821 | 0.9252 |
| gi 83269633 | sodium/alanine symporter                                   | BAB2_0754 | 0.9289 | 0.8451 | 0.9994 | 1.0977 |
| gi 83269607 | ybgT protein                                               | BAB2_0726 | 1.0324 | 0.9971 | 1.0455 | 1.0818 |
| gi 83269584 | binding-protein-dependent transport systems inner membrane | BAB2_0701 | 1.3136 | 1.253  | 0.9677 | 1.0138 |
| gi 83269535 | lipoyltransferase                                          | BAB2_0651 | 0.9908 | 0.9917 | 0.9394 | 0.9379 |
| gi 83269497 | saccharopine dehydrogenase                                 | BAB2_0610 | 1.0706 | 1.2051 | 1.1856 | 1.0525 |
| gi 83269473 | xanthine/uracil/vitamin C permease family protein          | BAB2_0578 |        |        |        |        |
| gi 83269455 | hypothetical protein BAB2_0560                             | BAB2_0560 | 1.063  | 0.9446 | 1.1257 | 1.266  |
| gi 83269413 | glycine cleavage system protein H                          | BAB2_0514 | 1.1995 | 1.2238 | 0.9525 | 0.933  |
| gi 83269364 | 3-ketoacyl-(acyl-carrier-protein) reductase                | BAB2_0461 | 0.9461 | 1.0238 | 1.0324 | 0.9533 |
| gi 83269272 | hypothetical protein BAB2_0356                             | BAB2_0356 |        |        |        |        |
| gi 83269189 | HAD family hydrolase                                       | BAB2_0265 | 1.0708 | 1.1971 | 1.1483 | 1.0265 |
| gi 83269159 | biphenyl-2,3-diol 1,2-dioxygenase III                      | BAB2_0231 | 1.0694 | 1.1519 | 1.0942 | 1.0152 |
| gi 83269134 | nickel-dependent hydrogenase b-type cytochrome subunit     | BAB2_0196 | 0.9704 | 0.9122 | 0.9152 | 0.973  |
| gi 83269125 | hypothetical protein BAB2_0187                             | BAB2_0187 | 0.991  | 0.8979 | 0.9923 | 1.0945 |
| gi 83269048 | hypothetical protein BAB2_0095                             | BAB2_0095 | 0.8578 | 1.2385 | 1.2749 | 0.8824 |
| gi 83268982 | ABC transporter ATPase                                     | BAB2_0026 | 0.9062 | 1.0394 | 1.1305 | 0.985  |
| gi 83268977 | extracytoplasmic function alternative sigma factor         | BAB2_0021 | 0.8667 | 0.9565 | 1.0521 | 0.9527 |
| gi 83268976 | sigma-70 region 2                                          | BAB2_0020 | 0.9143 | 1.0842 | 0.962  | 0.8108 |
| gi 83268962 | inosine/uridine-preferring nucleoside hydrolase            | BAB2_0005 | 1.0502 | 1.05   | 0.9902 | 0.9897 |
| gi 82700865 | hypothetical protein BAB1_2114                             | BAB1_2114 | 0.9648 | 0.964  | 1.0181 | 1.0183 |
| gi 82700849 | phosphocarrier HPr protein                                 | BAB1_2097 | 0.9156 | 1.1923 | 1.0131 | 0.7775 |
| gi 82700822 | hypothetical protein BAB1_2068                             | BAB1_2068 | 1.143  | 0.7974 | 1.1222 | 1.6075 |
| gi 82700751 | hypothetical protein BAB1_1992                             | BAB1_1992 | 0.8774 | 0.9744 | 1.1041 | 0.9935 |
| gi 82700742 | hypothetical protein BAB1_1983                             | BAB1_1983 | 1.0936 | 1.0615 | 0.9995 | 1.0291 |
| gi 82700711 | hypothetical protein BAB1_1948                             | BAB1_1948 | 0.8848 | 0.9641 | 1.1116 | 1.0195 |
| gi 82700701 | Beta-lactamase-like                                        | BAB1_1936 | 1.0583 | 0.9974 | 1.0115 | 1.0725 |
| gi 82700680 | tRNA (guanine-N(1)-)-methyltransferase                     | BAB1_1914 | 0.9721 | 0.8003 | 1.0091 | 1.2248 |
| gi 82700671 | succinate dehydrogenase, cytochrome b subunit              | BAB1_1903 | 1.048  | 0.9345 | 1.0081 | 1.1298 |
| gi 82700665 | Acyl-CoA thioesterase                                      | BAB1_1897 | 0.9934 | 1.0379 | 1.0084 | 0.9645 |
| gi 82700654 | uroporphyrinogen-III synthase                              | BAB1_1886 | 0.9831 | 0.9972 | 1.1104 | 1.094  |
| gi 82700557 | hypothetical protein BAB1_1784                             | BAB1_1784 | 1.0131 | 1.1023 | 1.1568 | 1.0624 |
| gi 82700514 | hypothetical protein BAB1_1738                             | BAB1_1738 | 0.9842 | 1.0179 | 0.9516 | 0.9195 |
| gi 82700468 | thromboxane receptor                                       | BAB1_1692 | 0.8638 | 0.9257 | 1.047  | 0.9763 |
| gi 82700444 | hypothetical protein BAB1_1667                             | BAB1_1667 | 0.8811 | 0.9329 | 1.0342 | 0.9761 |
| gi 82700398 | hypothetical protein BAB1_1610                             | BAB1_1610 | 1.0906 | 1.0959 | 1.0243 | 1.0186 |
| gi 82700377 | transcriptional regulator LysR                             | BAB1_1587 | 2.0973 | 2.134  | 1.0183 | 1.0001 |
| gi 82700349 | cytochrome c heme-binding site                             | BAB1_1557 | 1.2005 | 1.0171 | 0.9185 | 1.0834 |



SUPPLEMENTARY MATERIAL

|                  |                                                             |           |        |        |        |        |
|------------------|-------------------------------------------------------------|-----------|--------|--------|--------|--------|
| gi 82700340      | putative lipoprotein                                        | BAB1_1548 | 0.9963 | 0.9074 | 1.0026 | 1.1001 |
| gi 82700288      | immunoreactive 28 kDa outer membrane protein                | BAB1_1494 | 0.9167 | 0.9769 | 1.0339 | 0.9695 |
| gi 82700260      | peptidoglycan binding domain-containing protein             | BAB1_1462 | 0.7586 | 1.0729 | 1.138  | 0.8041 |
| gi 82700234      | ribosomal protein L11 methyltransferase                     | BAB1_1436 |        |        |        |        |
| gi 82700216      | thymidylate synthase                                        | BAB1_1418 | 0.8454 | 0.982  | 1.0904 | 0.9381 |
| gi 82700182      | ATP-dependent DNA ligase                                    | BAB1_1384 | 0.9038 | 1.138  | 1.1918 | 0.9458 |
| gi 82700026      | hypothetical protein BAB1_1214                              | BAB1_1214 | 0.8815 | 0.9569 | 0.9951 | 0.9161 |
| gi 82700015      | MerR family regulatory protein                              | BAB1_1201 | 0.8134 | 0.9246 | 0.9465 | 0.832  |
| gi 82700008      | ATP-dependent Clp protease adaptor protein ClpS             | BAB1_1192 | 1.2165 | 1.1394 | 0.9649 | 1.0296 |
| gi 82699982      | molybdenum cofactor biosynthesis protein C                  | BAB1_1165 | 0.6974 | 0.9887 | 1.2773 | 0.9003 |
| gi 82699918      | nitrogen-fixing NifU-like, N-terminal                       | BAB1_1096 | 0.9805 | 0.9172 | 0.9356 | 0.9996 |
| gi 82699873      | hypothetical protein BAB1_1041                              | BAB1_1041 | 1.1953 | 1.091  | 1.015  | 1.1113 |
| gi 82699870      | Sulfate transporter                                         | BAB1_1038 | 0.8633 | 1.1115 | 1.0793 | 0.8377 |
| gi 82699809      | heavy metal transport/detoxification protein                | BAB1_0960 | 0.9818 | 0.9767 | 1.1202 | 1.1253 |
| gi 82699803      | hypothetical protein BAB1_0952                              | BAB1_0952 | 0.9806 | 1.0885 | 1.0595 | 0.9539 |
| gi 82699771      | NADH dehydrogenase                                          | BAB1_0920 | 1.0542 | 1.0182 | 0.974  | 1.0077 |
| gi 82699757      | protein-L-isoaspartate O-methyltransferase                  | BAB1_0906 | 1.1164 | 1.0155 | 0.9298 | 1.0215 |
| gi 82699714      | phosphoribosylformylglycinamide synthase subunit I          | BAB1_0860 | 1.217  | 1.1121 | 0.9424 | 1.0307 |
| gi 82699674      | hypothetical protein BAB1_0817                              | BAB1_0817 | 1.0115 | 0.9988 | 0.9452 | 0.9566 |
| gi 82699668      | agmatinase                                                  | BAB1_0809 | 0.7673 | 1.0642 | 1.3824 | 0.996  |
| gi 82699638      | hypothetical protein BAB1_0779                              | BAB1_0779 | 0.952  | 1.0296 | 1.0625 | 0.9818 |
| gi 82699630      | hypothetical protein BAB1_0771                              | BAB1_0771 | 1.1013 | 0.9384 | 0.8689 | 1.0191 |
| gi 82699628      | ABC transporter ATPase                                      | BAB1_0769 | 1.0456 | 1.3211 | 1.2246 | 0.9686 |
| gi 82699586      | thiamineS                                                   | BAB1_0718 | 1.203  | 0.9615 | 0.8275 | 1.0345 |
| gi 82699536      | uracil-DNA glycosylase superfamily protein                  | BAB1_0668 | 0.9702 | 0.9412 | 1.0072 | 1.0375 |
| gi 82699531      | hypothetical protein BAB1_0663                              | BAB1_0663 | 0.8918 | 0.9456 | 0.9888 | 0.9319 |
| gi 82699502      | cytochrome C biogenesis protein                             | BAB1_0634 | 0.935  | 0.9513 | 1.0467 | 1.0281 |
| gi 82699441      | glycosyl transferase, group 1                               | BAB1_0563 | 1.185  | 0.8605 | 0.8948 | 1.2314 |
| gi 82699412      | transthyretin                                               | BAB1_0532 | 1.1254 | 1.1341 | 0.9761 | 0.9679 |
| gi 82699325      | enoyl-CoA hydratase                                         | BAB1_0439 | 0.9791 | 1.0444 | 1.0878 | 1.0191 |
| gi 82699323      | hypothetical protein BAB1_0437                              | BAB1_0437 | 1.0257 | 1.1288 | 0.935  | 0.849  |
| gi 82699298      | F0F1 ATP synthase subunit C                                 | BAB1_0412 | 0.9666 | 1.0104 | 1.0147 | 0.97   |
| gi 82699296      | ATP synthase KO: K02116 ATP synthase protein I              | BAB1_0410 | 0.8888 | 0.8023 | 1.103  | 1.2212 |
| gi 82699265      | hypothetical protein BAB1_0374                              | BAB1_0374 | 0.8899 | 1.1357 | 1.0221 | 0.8004 |
| gi 82699242      | large-conductance mechanosensitive channel                  | BAB1_0348 | 0.9462 | 0.9853 | 0.9734 | 0.9342 |
| gi 82699237      | hypothetical protein BAB1_0343                              | BAB1_0343 | 0.9284 | 1.0614 | 1.17   | 1.0228 |
| gi 82699151      | fumarylacetoacetate hydrolase                               | BAB1_0247 | 0.9141 | 1.0005 | 0.9677 | 0.8835 |
| gi 82699113      | DeoR family regulatory protein                              | BAB1_0199 | 0.6655 | 1.0354 | 1.2279 | 0.7887 |
| gi 82699070      | hypothetical protein BAB1_0154                              | BAB1_0154 | 1.0591 | 0.9945 | 0.9703 | 1.0325 |
| gi 82699046      | esterase/lipase/thioesterase, active site:putative esterase | BAB1_0124 | 0.9266 | 0.8659 | 1.0549 | 1.128  |
| gi 162002875     | phosphoribosyl-AMP cyclohydrolase                           | BAB1_1098 | 1.0923 | 1.0969 | 1.0334 | 1.0284 |
| RRRRRgi 82699912 | REVERSED PII uridylyl-transferase                           | BAB1_0143 | 1.0047 | 0.8509 | 0.9572 | 1.1295 |
| gi 82699912      | nitrilotriacetate monooxygenase component B                 | BAB1_1090 | 0.9162 | 0.9475 | 1.1281 | 1.0901 |

## SUPPLEMENTARY MATERIAL

|             |                                               |           |        |        |        |        |
|-------------|-----------------------------------------------|-----------|--------|--------|--------|--------|
| gi 83269035 | response regulator receiver                   | BAB2_0081 |        |        |        |        |
| gi 82700755 | hypothetical protein BAB1_1996                | BAB1_1996 | 0.9648 | 0.9998 | 0.9779 | 0.943  |
| gi 82700683 | hypothetical protein BAB1_1917                | BAB1_1917 |        |        |        |        |
| gi 82699039 | 3'-5' exonuclease                             | BAB1_0117 | 1.2426 | 0.9257 | 0.8506 | 1.141  |
| RRRRRgi 827 | REVERSED orotidine 5'-phosphate decarboxylase | BAB1_2132 |        |        |        |        |
| gi 82699031 | nicotinate phosphoribosyltransferase          | BAB1_0109 | 1.11   | 0.8923 | 0.8625 | 1.0722 |
| RRRRRgi 826 | REVERSED amidohydrolase 2                     | BAB1_0236 |        |        |        |        |
| gi 82699433 | glycosyl transferase, group 1                 | BAB1_0553 | 0.9781 | 0.9562 | 1.0782 | 1.1021 |
| gi 83269655 | GntR family regulatory protein                | BAB2_0777 |        |        |        |        |
| gi 82699919 | GTP cyclohydrolase I                          | BAB1_1097 | 1.0831 | 1.0094 | 1.0242 | 1.0982 |

## SUPPLEMENTARY MATERIAL

Table S1. Oligonucleotide primers used in this study.

| Primer name                | Sequence (5'→3')                                 |
|----------------------------|--------------------------------------------------|
| AbcR-Northern              | GGCAAACCTCCAGAGGGGAACACT                         |
| AbcR1-Northern             | GAAGTCCGGCCAAGTTATGAAGGTGCCACT                   |
| AbcR2-Northern             | CGTCCGGCTTTTGAATTTTGAAGGTGCCAT                   |
| 5S rRNA-Northern           | AGTTCGGAATGGGATCGGGTGCAGCC                       |
| AbcR1-5'-RACE              | TGGGAAGTCCGGCCAAGTTATG                           |
| AbcR2-5'-RACE              | AACGTCCGGCTTTTGAATTTTG                           |
| $\Delta abcR1$ -Up-For     | GCGGATCCCTGATCGACTATGGTTTCCA                     |
| $\Delta abcR1$ -Up-Rev     | GCCTGAAATCTAAAATTTCC                             |
| $\Delta abcR1$ -Dn-For     | TGCTCTATTCTTCAACCCCAA                            |
| $\Delta abcR1$ -Dn-Rev     | GCCTGCAGCGATCTTATTATTACCTCCTATGA                 |
| $\Delta abcR2$ -Up-For     | GCGGATCCCGAAGTCATCATTCCCGCCC                     |
| $\Delta abcR2$ -Up-Rev     | GGCTTTTGCCCGTTGTCCA                              |
| $\Delta abcR2$ -Dn-For     | GCACTGAGATGATCTTTATATGC                          |
| $\Delta abcR2$ -Dn-Rev     | GCCTGCAGAAACGCTTTATCGTACGGC                      |
| AbcR1-express-For          | ACTTACCGTTGTGCCTCCTCC                            |
| AbcR1-express-Rev          | GCTCTAGACGTGATGGGGAAATTTAGATT                    |
| AbcR2-express-For          | ATCTCAGTGCTGCGTTTCCTC                            |
| AbcR2-express-Rev          | GCTCTAGACATTCCAGGAATGGACAACCGG                   |
| Nonsense sRNA-express-For  | GGCCGCAAGGCCCTTTTTCAT                            |
| Nonsense sRNA-express-Rev  | GCTCTAGACGTTTCCTCCTCCCATTTTGCG                   |
| BAB1_0314- <i>gfp</i> -For | GCATGCATCGGAAAAACAGCAGCTTTGC                     |
| BAB1_0314- <i>gfp</i> -Rev | GCGCTAGCTGCTGATCCCGTGTGTTTCAT                    |
| BAB2_0879- <i>gfp</i> -For | GCATGCATCCGATCACGTTAGCATGTGAGTAA                 |
| BAB2_0879- <i>gfp</i> -Rev | GCGCTAGCAATTCCGCCATAAGGGCA                       |
| BAB2_0612- <i>gfp</i> -For | GCATGCATGGGACGCGCAAATGGGGC                       |
| BAB2_0612- <i>gfp</i> -Rev | GCGCTAGCGCCGGCAACTATGTCCT                        |
| BAB1_0310-North-For        | GCTATAATACGACTCACTATAGGGCAACCACAAAGGCCCTG        |
| BAB1_0310-North-Rev        | CCAATGAGGAAGGTACGCGC                             |
| BAB1_0314-North-For        | GCTATAATACGACTCACTATAGGGCCTCGAAGATCGTCACCTGAT    |
| BAB1_0314-North-Rev        | ACATTCTGGGCGGCATGTGC                             |
| BAB1_0578-North-For        | GCTATAATACGACTCACTATAGGGACGGATATAAAGCCCGTCGATC   |
| BAB1_0578-North-Rev        | TCTCAACGTGGCGATCAAACA                            |
| BAB1_1799-North-For        | GCTATAATACGACTCACTATAGGGCCGTCAGCGAACGAAATCAC     |
| BAB1_1799-North-Rev        | GTTCCCTACGAGCTGTTCCGGCA                          |
| BAB2_0508-North-For        | GCTATAATACGACTCACTATAGGGTAATAAACGCGATCGGCAGGC    |
| BAB2_0508-North-Rev        | GCATGGCGCGCATCGACTT                              |
| BAB2_0879-North-For        | GCTATAATACGACTCACTATAGGGTGCCCGGCCAGACGACCTTGAAAT |
| BAB2_0879-North-Rev        | CGATCGCTGCGCAAGAGTGCGAAA                         |

\*Underlined sections indicate restriction enzyme recognition sequences.

## SUPPLEMENTARY MATERIAL

Table S2. Plasmids used in this study.

| <u>Plasmid name</u> | <u>Description</u>                                                     | <u>Reference</u>      |
|---------------------|------------------------------------------------------------------------|-----------------------|
| pNPTS138            | Cloning vector; contains <i>sacB</i> gene; Kan <sup>R</sup>            | Spratt, 1986          |
| pXG10               | <i>gfp</i> fusion vector for UTR of target genes; Cm <sup>R</sup>      | Urban and Vogel, 2007 |
| pZE12               | sRNA expression vector; Amp <sup>R</sup>                               | Urban and Vogel, 2007 |
| pC <sup>3</sup> 022 | Deletion of <i>abcR1</i> plus 1 kb of each flanking region in pNPTS138 | This study            |
| pC <sup>3</sup> 023 | Deletion of <i>abcR2</i> plus 1 kb of each flanking region in pNPTS138 | This study            |
| pC <sup>3</sup> 024 | <i>abcR1</i> in pZE12                                                  | This study            |
| pC <sup>3</sup> 025 | <i>abcR2</i> in pZE12                                                  | This study            |
| pC <sup>3</sup> 026 | Nonsense sRNA in pZE12                                                 | This study            |
| pC <sup>3</sup> 027 | 5'-UTR of BAB1_0314 in pXG10                                           | This study            |
| pC <sup>3</sup> 028 | 5'-UTR of BAB2_0879 in pXG10                                           | This study            |
| pC <sup>3</sup> 032 | wild-type <i>abcR1</i> plus 1 kb of each flanking region in pNPTS138   | This study            |
| pC <sup>3</sup> 033 | wild-type <i>abcR2</i> plus 1 kb of each flanking region in pNPTS138   | This study            |
| pC <sup>3</sup> 034 | 5'-UTR of BAB2_0612 in pXG10                                           | This study            |
